# Supplementary material for: Histone H3 lysine 4 methyltransferase is required for facultative heterochromatin at specific loci
Source: BMC Genomics. 2019 May 8;20:350. doi: 10.1186/s12864-019-5729-7 (PMC6505117; doi:10.1186/s12864-019-5729-7)
Supplement: Supplementary file 3 — Table of Light-responsive genes in WT, ∆kmt2/∆set-1 and ∆kmt1/∆dim-5. (XLS 285 kb) [file 12864_2019_5729_MOESM3_ESM.xls]

## Sheet: WT
	gene_id	NCU	sample_1	sample_2	status	value_1(FPKM)	value_2(FPKM)	log2_fold_change	test_stat	p_value	q_value	significant
5116	MSTRG.4496	"NCU08699T0"	WT_DD	WT_LP	OK	1.1107	394.538	8.47255	13.0862	5e-05	0.00128834	yes
3991	MSTRG.2720	"NCU00552T0"	WT_DD	WT_LP	OK	5.81037	1954.99	8.39432	15.6173	5e-05	0.00128834	yes
3961	MSTRG.2680	"NCU00582T0"	WT_DD	WT_LP	OK	2.05235	421.41	7.68181	15.1221	5e-05	0.00128834	yes
2596	MSTRG.12939	"NCU02190T0"	WT_DD	WT_LP	OK	1.73029	254.875	7.20264	12.4973	5e-05	0.00128834	yes
6646	MSTRG.6392	"NCU08769T0"	WT_DD	WT_LP	OK	13.6153	1975.47	7.18082	8.25665	5e-05	0.00128834	yes
7846	MSTRG.7786	"NCU07325T0"	WT_DD	WT_LP	OK	5.44389	708.056	7.02308	12.7342	5e-05	0.00128834	yes
2161	MSTRG.12318	"NCU12026T0"	WT_DD	WT_LP	OK	0.285406	21.8038	6.25542	6.63102	0.00015	0.00331184	yes
1156	MSTRG.11340	"NCU03967T0"	WT_DD	WT_LP	OK	7.64903	575.359	6.23304	13.2881	5e-05	0.00128834	yes
3316	MSTRG.192	"NCU07434T0"	WT_DD	WT_LP	OK	2.25053	116.229	5.69056	10.6796	5e-05	0.00128834	yes
8476	MSTRG.8488	"NCU09830T0"	WT_DD	WT_LP	OK	1.12317	44.2403	5.29972	10.6087	5e-05	0.00128834	yes
346	MSTRG.10357	"NCU10063T0"	WT_DD	WT_LP	OK	4.26475	162.766	5.2542	0.970829	0.0006	0.0101835	yes
4426	MSTRG.3288	"NCU08626T0"	WT_DD	WT_LP	OK	6.02306	214.157	5.15203	11.4725	5e-05	0.00128834	yes
7561	MSTRG.7425	"NCU04452T0"	WT_DD	WT_LP	OK	39.2131	1113.53	4.82766	11.0788	5e-05	0.00128834	yes
8356	MSTRG.8356	"NCU08850T0"	WT_DD	WT_LP	OK	1.88889	48.6005	4.68536	9.60577	5e-05	0.00128834	yes
6931	MSTRG.6651	"NCU04950T1"	WT_DD	WT_LP	OK	1.34584	34.6177	4.68494	3.13186	0.00295	0.0346207	yes
1981	MSTRG.12136	"NCU06915T0"	WT_DD	WT_LP	OK	12.7031	306.524	4.59274	4.69563	5e-05	0.00128834	yes
7336	MSTRG.7136	"NCU08291T0"	WT_DD	WT_LP	OK	19.9931	459.981	4.524	10.6057	5e-05	0.00128834	yes
2896	MSTRG.13173	"NCU05844T0"	WT_DD	WT_LP	OK	4.2604	90.8963	4.41516	7.90894	5e-05	0.00128834	yes
8026	MSTRG.8050	"NCU08824T0"	WT_DD	WT_LP	OK	28.3829	560.155	4.30273	10.3302	5e-05	0.00128834	yes
8281	MSTRG.832	"MSTRG.832.1"	WT_DD	WT_LP	OK	1.88655	31.8913	4.07934	6.58504	5e-05	0.00128834	yes
2881	MSTRG.13172	"MSTRG.13172.1"	WT_DD	WT_LP	OK	0.408525	6.88443	4.07484	3.39988	0.0017	0.0228867	yes
1861	MSTRG.12045	"NCU11395T0"	WT_DD	WT_LP	OK	11.1505	181.897	4.02794	9.55715	5e-05	0.00128834	yes
6031	MSTRG.5705	"NCU00244T0"	WT_DD	WT_LP	OK	6.88463	112.139	4.02576	9.12292	5e-05	0.00128834	yes
7756	MSTRG.769	"NCU01861T0"	WT_DD	WT_LP	OK	19.99	311.529	3.96201	9.31657	5e-05	0.00128834	yes
3211	MSTRG.1771	"NCU10852T1"	WT_DD	WT_LP	OK	6.80785	92.6845	3.76706	7.69155	5e-05	0.00128834	yes
7471	MSTRG.7298	"NCU06306T0"	WT_DD	WT_LP	OK	5.99016	81.156	3.76003	8.83466	5e-05	0.00128834	yes
6691	MSTRG.6472	"NCU07585T0"	WT_DD	WT_LP	OK	20.3581	268.893	3.72335	9.04613	5e-05	0.00128834	yes
856	MSTRG.11021	"NCU05594T0"	WT_DD	WT_LP	OK	37.7534	496.615	3.71745	8.36715	5e-05	0.00128834	yes
6226	MSTRG.5866	"NCU00360T0"	WT_DD	WT_LP	OK	9.24331	120.602	3.7057	6.11391	5e-05	0.00128834	yes
3901	MSTRG.2664	"NCU00585T0"	WT_DD	WT_LP	OK	119.169	1488.36	3.64265	6.8945	5e-05	0.00128834	yes
1636	MSTRG.11905	"NCU11424T0"	WT_DD	WT_LP	OK	18.8514	231.981	3.62126	8.34063	5e-05	0.00128834	yes
7936	MSTRG.7873	"NCU07267T0"	WT_DD	WT_LP	OK	128.592	1574.75	3.61425	8.11122	5e-05	0.00128834	yes
5551	MSTRG.5062	"NCU06420T0"	WT_DD	WT_LP	OK	50.0163	609.356	3.60681	8.87756	5e-05	0.00128834	yes
7246	MSTRG.6906	"NCU06597T0"	WT_DD	WT_LP	OK	47.8944	561.854	3.55227	8.36635	5e-05	0.00128834	yes
1576	MSTRG.11834	"NCU05040T0"	WT_DD	WT_LP	OK	1.77799	20.721	3.54277	3.89121	0.0001	0.00234369	yes
2701	MSTRG.13023	"NCU08173T0"	WT_DD	WT_LP	OK	4.35057	50.6715	3.5419	7.49696	5e-05	0.00128834	yes
721	MSTRG.10868	"NCU04823T1"	WT_DD	WT_LP	OK	5.51078	61.4728	3.47962	7.19352	5e-05	0.00128834	yes
8926	MSTRG.9246	"NCU01089T1"	WT_DD	WT_LP	OK	8.00239	83.399	3.38153	8.21191	5e-05	0.00128834	yes
796	MSTRG.10954	"NCU05652T0"	WT_DD	WT_LP	OK	8.62946	86.3473	3.32281	6.73543	5e-05	0.00128834	yes
4396	MSTRG.3233	"NCU09235T0"	WT_DD	WT_LP	OK	11.5431	114.654	3.31218	7.81757	5e-05	0.00128834	yes
601	MSTRG.10717	"NCU04725T0"	WT_DD	WT_LP	OK	0.35007	3.15801	3.1733	3.20386	0.00195	0.0254182	yes
3226	MSTRG.1808	"NCU09141T0"	WT_DD	WT_LP	OK	39.2362	341.636	3.1222	7.57943	5e-05	0.00128834	yes
1441	MSTRG.11704	"NCU05143T0"	WT_DD	WT_LP	OK	2.66118	22.8641	3.10294	6.42724	5e-05	0.00128834	yes
9196	MSTRG.9671	"NCU01427T0"	WT_DD	WT_LP	OK	23.6259	197.05	3.06012	5.52468	5e-05	0.00128834	yes
8911	MSTRG.9204	"NCU01060T0"	WT_DD	WT_LP	OK	22.0735	182.906	3.05071	7.29303	5e-05	0.00128834	yes
9001	MSTRG.9285	"NCU01127T0"	WT_DD	WT_LP	OK	10.3752	84.7514	3.0301	6.83083	5e-05	0.00128834	yes
6406	MSTRG.6182	"MSTRG.6182.1"	WT_DD	WT_LP	OK	0.403281	3.28324	3.02526	3.24285	0.0022	0.0278065	yes
7321	MSTRG.7090	"NCU07661T0"	WT_DD	WT_LP	OK	11.9004	91.5321	2.94327	4.92746	5e-05	0.00128834	yes
6016	MSTRG.5695	"NCU00236T0"	WT_DD	WT_LP	OK	14.4685	105.364	2.8644	7.02778	5e-05	0.00128834	yes
2401	MSTRG.12749	"NCU02322T0"	WT_DD	WT_LP	OK	5.2171	37.8832	2.86024	5.9619	5e-05	0.00128834	yes
8986	MSTRG.9283	"NCU01124T0"	WT_DD	WT_LP	OK	9.83116	68.174	2.79379	6.52129	5e-05	0.00128834	yes
6391	MSTRG.6181	"NCU07541T0"	WT_DD	WT_LP	OK	4.83829	32.4925	2.74754	6.16478	5e-05	0.00128834	yes
2491	MSTRG.12827	"NCU02265T2"	WT_DD	WT_LP	OK	5.95459	39.0781	2.71429	4.93816	5e-05	0.00128834	yes
1876	MSTRG.12058	"NCU09057T0"	WT_DD	WT_LP	OK	41.2177	270.345	2.71347	5.77887	5e-05	0.00128834	yes
8266	MSTRG.8312	"NCU10040T0"	WT_DD	WT_LP	OK	16.2587	103.736	2.67364	6.03113	5e-05	0.00128834	yes
136	MSTRG.10192	"NCU04266T0"	WT_DD	WT_LP	OK	110.945	690.654	2.63812	6.57332	5e-05	0.00128834	yes
3616	MSTRG.2330	"NCU00838T0"	WT_DD	WT_LP	OK	21.5787	133.826	2.63268	6.51155	5e-05	0.00128834	yes
2476	MSTRG.12826	"MSTRG.12826.3"	WT_DD	WT_LP	OK	3.7621	23.1687	2.62257	4.15563	5e-05	0.00128834	yes
7921	MSTRG.7866	"NCU07264T0"	WT_DD	WT_LP	OK	27.7653	170.142	2.61539	5.34726	5e-05	0.00128834	yes
9361	MSTRG.987	"MSTRG.987.2"	WT_DD	WT_LP	OK	1.27676	7.66984	2.58671	3.47229	5e-05	0.00128834	yes
1171	MSTRG.11350	"NCU17113T0"	WT_DD	WT_LP	OK	7.60712	44.4735	2.54752	3.82044	5e-05	0.00128834	yes
6781	MSTRG.6522	"NCU07626T0"	WT_DD	WT_LP	OK	1.38848	7.88299	2.50523	3.05897	0.00125	0.018034	yes
1831	MSTRG.12041	"NCU09049T0"	WT_DD	WT_LP	OK	11.9888	68.0394	2.50468	5.79604	5e-05	0.00128834	yes
4216	MSTRG.3123	"NCU02801T0"	WT_DD	WT_LP	OK	34.9041	193.918	2.47397	5.58956	5e-05	0.00128834	yes
7726	MSTRG.768	"MSTRG.768.1"	WT_DD	WT_LP	OK	0.830894	4.50055	2.43736	3.08505	0.00075	0.0121238	yes
3781	MSTRG.2509	"MSTRG.2509.1"	WT_DD	WT_LP	OK	0.677996	3.67084	2.43676	2.8173	0.0015	0.0208096	yes
8491	MSTRG.8489	"NCU09829T0"	WT_DD	WT_LP	OK	3.52068	18.7023	2.40929	5.16068	5e-05	0.00128834	yes
8386	MSTRG.8381	"NCU07806T0"	WT_DD	WT_LP	OK	1.61164	8.50702	2.40013	3.53571	5e-05	0.00128834	yes
4456	MSTRG.3329	"NCU09615T0"	WT_DD	WT_LP	OK	3.27941	17.2317	2.39355	5.15964	5e-05	0.00128834	yes
946	MSTRG.11065	"MSTRG.11065.2"	WT_DD	WT_LP	OK	1.86839	9.76561	2.38592	4.60872	5e-05	0.00128834	yes
8971	MSTRG.9273	"NCU01112T0"	WT_DD	WT_LP	OK	5.59775	29.255	2.38577	4.58466	5e-05	0.00128834	yes
1291	MSTRG.1156	"NCU02713T0"	WT_DD	WT_LP	OK	24.5192	125.533	2.35608	5.76174	5e-05	0.00128834	yes
9226	MSTRG.9710	"NCU06655T0"	WT_DD	WT_LP	OK	7.38394	37.0364	2.32648	5.48357	5e-05	0.00128834	yes
3301	MSTRG.1919	"NCU09210T0"	WT_DD	WT_LP	OK	74.2235	364.497	2.29596	5.67959	5e-05	0.00128834	yes
7126	MSTRG.681	"NCU01922T0"	WT_DD	WT_LP	OK	15.9951	78.4563	2.29426	5.1417	5e-05	0.00128834	yes
4711	MSTRG.3925	"NCU06751T0"	WT_DD	WT_LP	OK	13.7188	66.692	2.28136	3.83546	5e-05	0.00128834	yes
31	MSTRG.10073	"MSTRG.10073.1"	WT_DD	WT_LP	OK	1.52003	7.2098	2.24586	3.59284	0.0001	0.00234369	yes
6511	MSTRG.6276	"NCU08568T0"	WT_DD	WT_LP	OK	7.20603	32.9519	2.19308	4.46407	5e-05	0.00128834	yes
3331	MSTRG.1922	"MSTRG.1922.1"	WT_DD	WT_LP	OK	0.524528	2.39662	2.19191	2.79725	0.00175	0.0233667	yes
9241	MSTRG.972	"NCU02596T0"	WT_DD	WT_LP	OK	54.1461	247.078	2.19004	5.46593	5e-05	0.00128834	yes
2176	MSTRG.12358	"NCU04539T0"	WT_DD	WT_LP	OK	1.32501	6.04061	2.18869	3.1813	0.00015	0.00331184	yes
4681	MSTRG.3865	"NCU06803T0"	WT_DD	WT_LP	OK	11.0297	50.2227	2.18695	4.9219	5e-05	0.00128834	yes
6961	MSTRG.6695	"NCU07962T0"	WT_DD	WT_LP	OK	96.3264	435.081	2.17528	4.96989	5e-05	0.00128834	yes
526	MSTRG.10592	"NCU07082T0"	WT_DD	WT_LP	OK	10.7701	48.5464	2.17233	5.36498	5e-05	0.00128834	yes
46	MSTRG.10079	"NCU04179T0"	WT_DD	WT_LP	OK	30.9081	138.257	2.1613	5.45288	5e-05	0.00128834	yes
7651	MSTRG.7537	"NCU04368T0"	WT_DD	WT_LP	OK	31.1491	139.178	2.15967	5.52047	5e-05	0.00128834	yes
3481	MSTRG.2177	"NCU00939T0"	WT_DD	WT_LP	OK	17.7701	77.9359	2.13284	5.43084	5e-05	0.00128834	yes
9331	MSTRG.9829	"NCU09534T0"	WT_DD	WT_LP	OK	50.5893	221.057	2.12752	4.37712	5e-05	0.00128834	yes
9346	MSTRG.9830	"NCU09535T0"	WT_DD	WT_LP	OK	17.5394	76.5933	2.12662	2.81558	0.00045	0.00807047	yes
8881	MSTRG.9140	"NCU00999T0"	WT_DD	WT_LP	OK	48.1028	209.091	2.11994	5.21277	5e-05	0.00128834	yes
5926	MSTRG.560	"NCU01997T0"	WT_DD	WT_LP	OK	17.7766	76.9077	2.11315	5.38139	5e-05	0.00128834	yes
1126	MSTRG.1127	"NCU02691T1"	WT_DD	WT_LP	OK	7.58669	32.8006	2.11218	4.63504	5e-05	0.00128834	yes
5701	MSTRG.5270	"NCU06231T0"	WT_DD	WT_LP	OK	16.3929	69.5287	2.08454	5.22487	5e-05	0.00128834	yes
2341	MSTRG.12654	"NCU02397T0"	WT_DD	WT_LP	OK	55.9492	235.51	2.0736	4.98553	5e-05	0.00128834	yes
7186	MSTRG.6851	"NCU06553T0"	WT_DD	WT_LP	OK	7.10212	29.2987	2.04452	3.32882	5e-05	0.00128834	yes
7876	MSTRG.7799	"NCU07314T1"	WT_DD	WT_LP	OK	7.31428	30.0924	2.04061	4.99571	5e-05	0.00128834	yes
316	MSTRG.10351	"NCU09841T0"	WT_DD	WT_LP	OK	20.4824	83.3829	2.02537	4.66985	5e-05	0.00128834	yes
6556	MSTRG.6311	"NCU16710T0"	WT_DD	WT_LP	OK	9.85189	40.0164	2.02212	3.46068	5e-05	0.00128834	yes
5956	MSTRG.5643	"NCU00203T0"	WT_DD	WT_LP	OK	34.5442	138.956	2.00811	4.80682	5e-05	0.00128834	yes
7141	MSTRG.682	"NCU11201T0"	WT_DD	WT_LP	OK	11.0098	43.6162	1.98608	4.49765	5e-05	0.00128834	yes
9076	MSTRG.9359	"NCU01188T0"	WT_DD	WT_LP	OK	14.4403	56.6084	1.97092	4.85405	5e-05	0.00128834	yes
3916	MSTRG.2666	"NCU00584T0"	WT_DD	WT_LP	OK	47.9326	180.444	1.91247	4.7829	5e-05	0.00128834	yes
8401	MSTRG.8391	"NCU07794T0"	WT_DD	WT_LP	OK	11.7498	43.9367	1.90279	3.66097	5e-05	0.00128834	yes
6751	MSTRG.6508	"NCU07617T0"	WT_DD	WT_LP	OK	2.83424	10.5584	1.89736	3.66099	5e-05	0.00128834	yes
211	MSTRG.1027	"NCU02636T0"	WT_DD	WT_LP	OK	15.6281	58.0686	1.89361	4.62049	5e-05	0.00128834	yes
3946	MSTRG.2678	"NCU00586T0"	WT_DD	WT_LP	OK	20.6104	76.5344	1.89273	4.7256	5e-05	0.00128834	yes
8806	MSTRG.8880	"NCU03647T0"	WT_DD	WT_LP	OK	5.74268	21.0506	1.87407	4.4552	5e-05	0.00128834	yes
7021	MSTRG.6751	"NCU07923T0"	WT_DD	WT_LP	OK	3.10097	11.2775	1.86266	3.21501	5e-05	0.00128834	yes
1336	MSTRG.11609	"MSTRG.11609.1"	WT_DD	WT_LP	OK	2.8367	10.2788	1.85739	3.76086	5e-05	0.00128834	yes
1081	MSTRG.1123	"NCU02690T0"	WT_DD	WT_LP	OK	8.55258	30.854	1.85102	4.42802	5e-05	0.00128834	yes
4171	MSTRG.3086	"MSTRG.3086.1"	WT_DD	WT_LP	OK	1.42932	5.14153	1.84687	2.61598	0.0006	0.0101835	yes
9136	MSTRG.955	"NCU02579T0"	WT_DD	WT_LP	OK	12.8116	46.068	1.84632	4.12553	5e-05	0.00128834	yes
1426	MSTRG.11698	"NCU05148T0"	WT_DD	WT_LP	OK	32.8747	117.578	1.83857	4.35908	5e-05	0.00128834	yes
3601	MSTRG.2308	"NCU00865T0"	WT_DD	WT_LP	OK	16.7767	59.9625	1.8376	2.79762	0.0002	0.00420033	yes
2971	MSTRG.1336	"NCU09820T0"	WT_DD	WT_LP	OK	138.862	495.033	1.83387	3.95636	5e-05	0.00128834	yes
3181	MSTRG.1604	"NCU03213T0"	WT_DD	WT_LP	OK	12.6368	44.7108	1.823	4.0159	5e-05	0.00128834	yes
3691	MSTRG.2427	"NCU00761T1"	WT_DD	WT_LP	OK	0.755124	2.65077	1.81162	3.15617	5e-05	0.00128834	yes
2266	MSTRG.12428	"NCU06125T0"	WT_DD	WT_LP	OK	56.1794	196.595	1.80711	4.60211	5e-05	0.00128834	yes
5821	MSTRG.5475	"NCU00088T0"	WT_DD	WT_LP	OK	14.4319	50.1059	1.79572	4.21975	5e-05	0.00128834	yes
2236	MSTRG.12423	"NCU06129T0"	WT_DD	WT_LP	OK	2.34612	8.14074	1.79489	2.89542	0.0002	0.00420033	yes
8791	MSTRG.8853	"MSTRG.8853.1"	WT_DD	WT_LP	OK	3.45228	11.9066	1.78614	3.02862	5e-05	0.00128834	yes
2686	MSTRG.12998	"MSTRG.12998.1"	WT_DD	WT_LP	OK	0.882319	3.03688	1.78322	2.54675	0.00245	0.0301521	yes
901	MSTRG.11054	"MSTRG.11054.1"	WT_DD	WT_LP	OK	36.221	123.778	1.77286	3.4871	5e-05	0.00128834	yes
6541	MSTRG.6309	"NCU08549T0"	WT_DD	WT_LP	OK	44.6405	151.693	1.76473	4.45586	5e-05	0.00128834	yes
6871	MSTRG.6600	"NCU04908T0"	WT_DD	WT_LP	OK	22.3219	75.0548	1.74948	2.73252	0.0008	0.012757	yes
1186	MSTRG.11351	"MSTRG.11351.1"	WT_DD	WT_LP	OK	1.72002	5.76375	1.74458	3.02952	0.00035	0.00660875	yes
1036	MSTRG.11170	"NCU10011T0"	WT_DD	WT_LP	OK	39.456	132.173	1.74411	4.49127	5e-05	0.00128834	yes
7036	MSTRG.6755	"NCU07921T0"	WT_DD	WT_LP	OK	14.2951	47.5239	1.73313	3.60115	5e-05	0.00128834	yes
781	MSTRG.10949	"NCU09799T0"	WT_DD	WT_LP	OK	2.54536	8.43782	1.729	3.13704	5e-05	0.00128834	yes
8551	MSTRG.8558	"NCU09692T0"	WT_DD	WT_LP	OK	7.36828	24.2572	1.71902	3.97634	5e-05	0.00128834	yes
8956	MSTRG.9269	"NCU01107T0"	WT_DD	WT_LP	OK	166.009	545.769	1.71703	4.11709	5e-05	0.00128834	yes
2731	MSTRG.13071	"NCU05770T0"	WT_DD	WT_LP	OK	92.954	303.882	1.70892	4.0454	5e-05	0.00128834	yes
2131	MSTRG.12301	"NCU09715T0"	WT_DD	WT_LP	OK	41.6624	135.458	1.70103	3.84202	5e-05	0.00128834	yes
1531	MSTRG.11794	"NCU05069T0"	WT_DD	WT_LP	OK	3.10026	10.0435	1.6958	2.46681	0.00045	0.00807047	yes
2251	MSTRG.12424	"NCU06128T0"	WT_DD	WT_LP	OK	3.03748	9.83907	1.69565	3.18943	5e-05	0.00128834	yes
7156	MSTRG.6842	"NCU06549T0"	WT_DD	WT_LP	OK	100.78	325.925	1.69333	4.14029	5e-05	0.00128834	yes
1231	MSTRG.11410	"NCU04021T0"	WT_DD	WT_LP	OK	7.89275	25.4162	1.68715	4.25373	5e-05	0.00128834	yes
4531	MSTRG.35	"NCU08057T0"	WT_DD	WT_LP	OK	18.8254	60.4029	1.68194	3.94375	5e-05	0.00128834	yes
3526	MSTRG.2248	"MSTRG.2248.1"	WT_DD	WT_LP	OK	0.59283	1.9005	1.68069	2.57305	0.0009	0.0139539	yes
571	MSTRG.10624	"NCU07061T0"	WT_DD	WT_LP	OK	36.7233	117.371	1.6763	3.75285	5e-05	0.00128834	yes
3136	MSTRG.1518	"NCU03151T0"	WT_DD	WT_LP	OK	481.378	1536.57	1.67448	2.38297	0.00175	0.0233667	yes
7051	MSTRG.6760	"NCU07915T0"	WT_DD	WT_LP	OK	14.3447	45.7179	1.67224	3.05765	5e-05	0.00128834	yes
8311	MSTRG.8331	"NCU10291T0"	WT_DD	WT_LP	OK	2.06199	6.52078	1.66101	3.37453	5e-05	0.00128834	yes
1411	MSTRG.11693	"NCU05151T0"	WT_DD	WT_LP	OK	4.97953	15.7371	1.66009	3.77284	5e-05	0.00128834	yes
7741	MSTRG.7681	"NCU08048T0"	WT_DD	WT_LP	OK	16.2216	51.2192	1.65877	3.97926	5e-05	0.00128834	yes
1051	MSTRG.11171	"NCU10012T0"	WT_DD	WT_LP	OK	5.94433	18.7269	1.65552	3.60284	5e-05	0.00128834	yes
5386	MSTRG.4856	"NCU05683T0"	WT_DD	WT_LP	OK	7.21223	22.6586	1.65154	3.89373	5e-05	0.00128834	yes
6436	MSTRG.6222	"NCU16699T0"	WT_DD	WT_LP	OK	3.58119	11.1774	1.64208	3.10689	0.0001	0.00234369	yes
5476	MSTRG.4962	"NCU07837T0"	WT_DD	WT_LP	OK	10.6774	32.6866	1.61414	4.1332	5e-05	0.00128834	yes
6661	MSTRG.6409	"NCU08755T0"	WT_DD	WT_LP	OK	0.764858	2.32641	1.60484	2.49497	0.00155	0.021357	yes
7201	MSTRG.6855	"NCU06554T0"	WT_DD	WT_LP	OK	44.8876	136.143	1.60073	4.13917	5e-05	0.00128834	yes
3511	MSTRG.2210	"MSTRG.2210.1"	WT_DD	WT_LP	OK	38.7387	117.37	1.59922	4.01785	5e-05	0.00128834	yes
3166	MSTRG.1570	"NCU03188T0"	WT_DD	WT_LP	OK	54.7451	165.07	1.59227	3.6458	5e-05	0.00128834	yes
7816	MSTRG.7775	"NCU07332T0"	WT_DD	WT_LP	OK	22.5959	67.9387	1.58817	3.30546	5e-05	0.00128834	yes
1321	MSTRG.11608	"NCU05964T0"	WT_DD	WT_LP	OK	9.47077	28.421	1.5854	2.71768	0.00065	0.01087	yes
556	MSTRG.10596	"NCU07075T0"	WT_DD	WT_LP	OK	8.73465	25.9305	1.56983	3.55091	5e-05	0.00128834	yes
9181	MSTRG.9663	"NCU01422T0"	WT_DD	WT_LP	OK	203.976	603.248	1.56435	3.79382	5e-05	0.00128834	yes
9391	MSTRG.988	"NCU02608T0"	WT_DD	WT_LP	OK	4.99707	14.668	1.55352	2.59991	0.0007	0.0115127	yes
6856	MSTRG.6598	"NCU16742T0"	WT_DD	WT_LP	OK	27.4664	80.5589	1.55238	3.78644	5e-05	0.00128834	yes
4321	MSTRG.3177	"NCU02765T0"	WT_DD	WT_LP	OK	270.244	786.524	1.54123	3.77214	5e-05	0.00128834	yes
5041	MSTRG.437	"NCU02084T0"	WT_DD	WT_LP	OK	8.43244	24.4683	1.53689	2.99423	5e-05	0.00128834	yes
2281	MSTRG.12469	"NCU06095T1"	WT_DD	WT_LP	OK	35.9285	103.142	1.52143	3.90136	5e-05	0.00128834	yes
301	MSTRG.10349	"MSTRG.10349.1"	WT_DD	WT_LP	OK	82.9424	237.557	1.51809	3.73337	5e-05	0.00128834	yes
4981	MSTRG.4306	"NCU01555T0"	WT_DD	WT_LP	OK	45.6164	130.635	1.51792	3.67655	5e-05	0.00128834	yes
4366	MSTRG.3210	"MSTRG.3210.1"	WT_DD	WT_LP	OK	1.66043	4.7365	1.51227	2.46491	0.00095	0.0145566	yes
7861	MSTRG.7790	"NCU07323T0"	WT_DD	WT_LP	OK	2.32454	6.6308	1.51224	2.75555	5e-05	0.00128834	yes
2041	MSTRG.12173	"NCU06940T0"	WT_DD	WT_LP	OK	110.747	312.799	1.49797	3.50099	5e-05	0.00128834	yes
5611	MSTRG.52	"NCU08070T0"	WT_DD	WT_LP	OK	12.3194	34.6339	1.49125	3.5586	5e-05	0.00128834	yes
7951	MSTRG.7940	"NCU16867T0"	WT_DD	WT_LP	OK	1.61041	4.52421	1.49024	2.45195	0.0012	0.0174659	yes
2326	MSTRG.12571	"NCU06018T0"	WT_DD	WT_LP	OK	2.08718	5.79175	1.47244	2.41029	0.00205	0.0263925	yes
5431	MSTRG.4902	"NCU05721T0"	WT_DD	WT_LP	OK	12.9073	35.6257	1.46474	3.74009	5e-05	0.00128834	yes
6301	MSTRG.6006	"NCU00456T0"	WT_DD	WT_LP	OK	28.1209	77.4988	1.46253	3.44293	5e-05	0.00128834	yes
1666	MSTRG.11979	"NCU09451T0"	WT_DD	WT_LP	OK	2.57467	7.06134	1.45555	2.72089	0.0002	0.00420033	yes
1276	MSTRG.11544	"NCU05995T0"	WT_DD	WT_LP	OK	475.305	1298.45	1.44987	2.59804	0.00045	0.00807047	yes
5161	MSTRG.4618	"NCU09335T0"	WT_DD	WT_LP	OK	24.1799	65.8334	1.44501	3.64525	5e-05	0.00128834	yes
9286	MSTRG.9738	"NCU11337T0"	WT_DD	WT_LP	OK	138.563	374.212	1.43331	3.49813	5e-05	0.00128834	yes
7666	MSTRG.7564	"NCU04343T0"	WT_DD	WT_LP	OK	280.519	754.626	1.42766	2.84871	5e-05	0.00128834	yes
7771	MSTRG.7727	"NCU08674T0"	WT_DD	WT_LP	OK	16.5043	44.2353	1.42235	3.41334	5e-05	0.00128834	yes
3766	MSTRG.2506	"NCU00711T0"	WT_DD	WT_LP	OK	2.9346	7.82583	1.41508	2.85253	5e-05	0.00128834	yes
1021	MSTRG.11163	"NCU05490T0"	WT_DD	WT_LP	OK	316.648	843.313	1.41319	3.41752	5e-05	0.00128834	yes
3661	MSTRG.2399	"NCU10894T0"	WT_DD	WT_LP	OK	41.3996	110.195	1.41237	3.20696	5e-05	0.00128834	yes
6151	MSTRG.579	"NCU01989T0"	WT_DD	WT_LP	OK	14.4843	38.3722	1.40557	3.30547	5e-05	0.00128834	yes
4126	MSTRG.2965	"NCU02928T0"	WT_DD	WT_LP	OK	1.68179	4.38907	1.38392	2.55064	0.00105	0.0157475	yes
6046	MSTRG.5709	"NCU00246T0"	WT_DD	WT_LP	OK	4.99116	12.9854	1.37945	2.55639	0.00065	0.01087	yes
1846	MSTRG.12043	"MSTRG.12043.1"	WT_DD	WT_LP	OK	2.95136	7.67163	1.37815	2.67331	0.0002	0.00420033	yes
4816	MSTRG.4016	"NCU01810T0"	WT_DD	WT_LP	OK	26.047	67.5317	1.37445	3.50216	5e-05	0.00128834	yes
7261	MSTRG.6932	"NCU06616T0"	WT_DD	WT_LP	OK	10.8836	28.216	1.37436	3.15608	5e-05	0.00128834	yes
5401	MSTRG.4886	"NCU05706T0"	WT_DD	WT_LP	OK	29.9377	77.5427	1.37303	3.43489	5e-05	0.00128834	yes
1246	MSTRG.11435	"NCU04039T0"	WT_DD	WT_LP	OK	16.0586	41.5447	1.37132	2.58061	0.0004	0.007345	yes
286	MSTRG.10325	"NCU08949T0"	WT_DD	WT_LP	OK	165.249	423.663	1.35828	3.45626	5e-05	0.00128834	yes
4411	MSTRG.3246	"MSTRG.3246.1"	WT_DD	WT_LP	OK	2.86524	7.3446	1.35803	2.61115	0.0007	0.0115127	yes
1771	MSTRG.12032	"NCU09043T0"	WT_DD	WT_LP	OK	115.485	295.994	1.35786	3.44662	5e-05	0.00128834	yes
2461	MSTRG.12815	"NCU02273T0"	WT_DD	WT_LP	OK	180.037	461.18	1.35703	3.25656	5e-05	0.00128834	yes
6571	MSTRG.6319	"NCU08537T0"	WT_DD	WT_LP	OK	9.94933	25.4493	1.35496	3.38187	5e-05	0.00128834	yes
61	MSTRG.10084	"MSTRG.10084.1"	WT_DD	WT_LP	OK	16.7429	42.6169	1.34788	2.56115	0.00045	0.00807047	yes
271	MSTRG.10316	"NCU08943T0"	WT_DD	WT_LP	OK	8.50088	21.5314	1.34076	2.7621	0.00015	0.00331184	yes
4246	MSTRG.3141	"NCU10239T0"	WT_DD	WT_LP	OK	2.12608	5.37789	1.33884	2.43802	0.00155	0.021357	yes
1396	MSTRG.11681	"NCU05157T0"	WT_DD	WT_LP	OK	9.12185	23.0459	1.33711	2.76887	5e-05	0.00128834	yes
6196	MSTRG.5822	"NCU00326T1"	WT_DD	WT_LP	OK	31.058	78.1897	1.33201	3.47759	5e-05	0.00128834	yes
6901	MSTRG.6611	"NCU04921T0"	WT_DD	WT_LP	OK	19.8715	49.1081	1.30526	3.23783	5e-05	0.00128834	yes
16	MSTRG.10065	"NCU04174T0"	WT_DD	WT_LP	OK	6.19403	15.2867	1.30333	2.51778	0.00075	0.0121238	yes
7636	MSTRG.753	"NCU01873T0"	WT_DD	WT_LP	OK	16.2226	39.7527	1.29305	3.27326	5e-05	0.00128834	yes
1606	MSTRG.11880	"NCU05005T0"	WT_DD	WT_LP	OK	5.57234	13.642	1.2917	2.38191	0.0017	0.0228867	yes
1201	MSTRG.1140	"NCU02702T0"	WT_DD	WT_LP	OK	7.15256	17.4223	1.2844	2.82489	5e-05	0.00128834	yes
8296	MSTRG.8323	"NCU08880T0"	WT_DD	WT_LP	OK	11.3967	27.6646	1.27942	2.97539	5e-05	0.00128834	yes
4576	MSTRG.3721	"NCU05384T0"	WT_DD	WT_LP	OK	6.65557	16.0901	1.27354	2.76397	0.0001	0.00234369	yes
6106	MSTRG.5778	"MSTRG.5778.1"	WT_DD	WT_LP	OK	1050.43	2534.32	1.27062	2.51434	0.0004	0.007345	yes
7291	MSTRG.700	"NCU01903T0"	WT_DD	WT_LP	OK	33.388	80.2223	1.26467	2.66135	0.00045	0.00807047	yes
6121	MSTRG.5785	"MSTRG.5785.1"	WT_DD	WT_LP	OK	29.8111	71.5741	1.26359	3.19612	5e-05	0.00128834	yes
6076	MSTRG.5752	"NCU00276T0"	WT_DD	WT_LP	OK	5.47933	13.1372	1.26159	3.07445	5e-05	0.00128834	yes
4156	MSTRG.3084	"MSTRG.3084.2"	WT_DD	WT_LP	OK	7.54359	18.0091	1.2554	2.61435	0.00045	0.00807047	yes
8011	MSTRG.8049	"NCU10777T0"	WT_DD	WT_LP	OK	74.7872	178.445	1.25462	2.89361	5e-05	0.00128834	yes
1996	MSTRG.12150	"NCU06932T0"	WT_DD	WT_LP	OK	2.69015	6.3889	1.24788	2.38169	0.00155	0.021357	yes
1066	MSTRG.112	"NCU07498T0"	WT_DD	WT_LP	OK	9.69894	22.9952	1.24543	3.15951	5e-05	0.00128834	yes
7576	MSTRG.7461	"NCU04426T0"	WT_DD	WT_LP	OK	8.80074	20.7913	1.24028	2.84567	5e-05	0.00128834	yes
3061	MSTRG.1406	"NCU03071T0"	WT_DD	WT_LP	OK	19.3946	45.4321	1.22806	3.19204	5e-05	0.00128834	yes
9091	MSTRG.9401	"NCU01219T0"	WT_DD	WT_LP	OK	191.195	446.539	1.22374	2.63451	0.0002	0.00420033	yes
2386	MSTRG.12706	"NCU02356T0"	WT_DD	WT_LP	OK	34.4589	80.4625	1.22344	3.12993	5e-05	0.00128834	yes
7276	MSTRG.6992	"NCU07730T0"	WT_DD	WT_LP	OK	2.32508	5.39608	1.21463	2.40241	0.0009	0.0139539	yes
3406	MSTRG.2090	"NCU09886T0"	WT_DD	WT_LP	OK	28.7844	66.7821	1.21417	3.08637	5e-05	0.00128834	yes
256	MSTRG.1031	"NCU02629T0"	WT_DD	WT_LP	OK	185.141	428.902	1.21202	2.88446	5e-05	0.00128834	yes
3121	MSTRG.1510	"NCU03152T0"	WT_DD	WT_LP	OK	88.1293	203.63	1.20826	3.12209	5e-05	0.00128834	yes
1756	MSTRG.12029	"NCU09041T0"	WT_DD	WT_LP	OK	358.14	823.927	1.20199	2.78505	5e-05	0.00128834	yes
196	MSTRG.10239	"NCU04295T0"	WT_DD	WT_LP	OK	8.51521	19.5876	1.20182	2.88518	0.0001	0.00234369	yes
6256	MSTRG.5919	"NCU00401T1"	WT_DD	WT_LP	OK	25.9157	59.5447	1.20014	3.10748	5e-05	0.00128834	yes
4636	MSTRG.3813	"NCU06856T0"	WT_DD	WT_LP	OK	19.5841	44.847	1.19533	2.95152	5e-05	0.00128834	yes
1306	MSTRG.11566	"NCU05982T0"	WT_DD	WT_LP	OK	5.57745	12.7491	1.19272	2.31531	0.00225	0.0282707	yes
4141	MSTRG.3012	"NCU02887T0"	WT_DD	WT_LP	OK	66.2808	150.512	1.18322	2.64001	0.0002	0.00420033	yes
5536	MSTRG.5042	"NCU06407T0"	WT_DD	WT_LP	OK	19.379	44.0014	1.18305	3.05723	5e-05	0.00128834	yes
9301	MSTRG.974	"NCU02597T0"	WT_DD	WT_LP	OK	14.6354	33.2029	1.18184	2.69629	0.0002	0.00420033	yes
7681	MSTRG.7567	"NCU04342T0"	WT_DD	WT_LP	OK	162.777	368.052	1.17702	2.89266	5e-05	0.00128834	yes
4111	MSTRG.2933	"NCU02948T0"	WT_DD	WT_LP	OK	144.023	325.598	1.17679	2.56233	0.00025	0.00504322	yes
4021	MSTRG.2759	"NCU00522T0"	WT_DD	WT_LP	OK	46.2987	104.426	1.17344	2.28386	0.0015	0.0208096	yes
3076	MSTRG.143	"NCU07474T0"	WT_DD	WT_LP	OK	5.02722	11.2927	1.16756	2.26609	0.0017	0.0228867	yes
6886	MSTRG.6606	"NCU04914T0"	WT_DD	WT_LP	OK	16.347	36.6721	1.16565	2.71164	0.00015	0.00331184	yes
7591	MSTRG.7471	"NCU04416T0"	WT_DD	WT_LP	OK	4.12406	9.22493	1.16147	2.28358	0.00175	0.0233667	yes
8581	MSTRG.8609	"NCU04669T0"	WT_DD	WT_LP	OK	47.044	105.227	1.16142	2.94037	5e-05	0.00128834	yes
4441	MSTRG.3307	"NCU10028T0"	WT_DD	WT_LP	OK	52.1213	116.576	1.16133	2.63781	0.00025	0.00504322	yes
5986	MSTRG.5666	"NCU00227T0"	WT_DD	WT_LP	OK	21.0044	46.9069	1.15911	2.91596	0.0001	0.00234369	yes
8761	MSTRG.8774	"NCU11040T0"	WT_DD	WT_LP	OK	42.4303	94.6309	1.15722	3.01492	5e-05	0.00128834	yes
2446	MSTRG.12793	"NCU02289T0"	WT_DD	WT_LP	OK	162.279	361.777	1.15662	2.91859	0.00015	0.00331184	yes
1486	MSTRG.11725	"NCU05131T1"	WT_DD	WT_LP	OK	8.85518	19.6999	1.15359	2.55781	0.0001	0.00234369	yes
3721	MSTRG.2457	"NCU00743T0"	WT_DD	WT_LP	OK	154.941	344.358	1.1522	2.52881	0.00045	0.00807047	yes
4786	MSTRG.3979	"NCU01831T0"	WT_DD	WT_LP	OK	8.64202	19.13	1.1464	2.69046	0.00025	0.00504322	yes
5881	MSTRG.5550	"NCU00137T0"	WT_DD	WT_LP	OK	35.1322	77.7331	1.14574	2.83149	5e-05	0.00128834	yes
7531	MSTRG.7386	"NCU04483T0"	WT_DD	WT_LP	OK	10.8907	23.9634	1.13774	2.53295	0.00025	0.00504322	yes
6181	MSTRG.5817	"NCU00322T0"	WT_DD	WT_LP	OK	123.914	271.239	1.13023	2.88357	5e-05	0.00128834	yes
3871	MSTRG.2644	"NCU00605T0"	WT_DD	WT_LP	OK	4.99769	10.9329	1.12935	2.43682	0.00125	0.018034	yes
3631	MSTRG.2335	"NCU00847T0"	WT_DD	WT_LP	OK	17.5433	38.2593	1.12489	2.24305	0.0025	0.0305862	yes
1456	MSTRG.11706	"NCU05141T0"	WT_DD	WT_LP	OK	39.5902	85.6283	1.11294	2.81508	0.0001	0.00234369	yes
6136	MSTRG.5786	"MSTRG.5786.3"	WT_DD	WT_LP	OK	136.234	293.426	1.10691	2.84888	0.0001	0.00234369	yes
2056	MSTRG.12191	"NCU09580T0"	WT_DD	WT_LP	OK	3.84073	8.20166	1.09454	2.28105	0.0015	0.0208096	yes
2611	MSTRG.12957	"NCU08133T0"	WT_DD	WT_LP	OK	16.7696	35.6783	1.0892	2.51267	0.0003	0.00584877	yes
3151	MSTRG.156	"NCU07465T1"	WT_DD	WT_LP	OK	101.846	216.283	1.08654	2.67596	5e-05	0.00128834	yes
1621	MSTRG.11885	"NCU12151T0"	WT_DD	WT_LP	OK	8.55546	18.1645	1.0862	2.18126	0.0028	0.0332335	yes
7171	MSTRG.6844	"NCU06550T0"	WT_DD	WT_LP	OK	784.651	1663.54	1.08413	2.22646	0.00245	0.0301521	yes
3976	MSTRG.2690	"NCU00575T0"	WT_DD	WT_LP	OK	72.6078	153.849	1.08331	2.63816	0.0003	0.00584877	yes
8416	MSTRG.8458	"NCU07745T0"	WT_DD	WT_LP	OK	32.2593	68.3149	1.08249	2.7778	0.0001	0.00234369	yes
9061	MSTRG.9336	"NCU10359T0"	WT_DD	WT_LP	OK	6.08895	12.8857	1.08151	2.49395	0.00045	0.00807047	yes
7351	MSTRG.7138	"NCU08290T0"	WT_DD	WT_LP	OK	15.5184	32.8205	1.08062	2.67686	0.00025	0.00504322	yes
9271	MSTRG.9734	"MSTRG.9734.2"	WT_DD	WT_LP	OK	4.62053	9.73987	1.07584	2.374	0.00075	0.0121238	yes
421	MSTRG.10423	"MSTRG.10423.1"	WT_DD	WT_LP	OK	9.9417	20.9243	1.07362	2.50686	0.00035	0.00660875	yes
3421	MSTRG.2112	"NCU00992T1"	WT_DD	WT_LP	OK	7.33714	15.4421	1.07358	2.47771	0.00045	0.00807047	yes
2746	MSTRG.13073	"NCU05771T0"	WT_DD	WT_LP	OK	7.64881	16.0752	1.07153	2.36953	0.00105	0.0157475	yes
6271	MSTRG.5972	"NCU00430T0"	WT_DD	WT_LP	OK	68.7483	144.482	1.0715	2.67008	0.00025	0.00504322	yes
331	MSTRG.10355	"NCU09844T0"	WT_DD	WT_LP	OK	3.76195	7.90325	1.07097	2.34916	0.00105	0.0157475	yes
8191	MSTRG.8228	"NCU05235T0"	WT_DD	WT_LP	OK	7.23472	15.1839	1.06954	2.1738	0.00275	0.0327688	yes
6211	MSTRG.5829	"NCU00332T0"	WT_DD	WT_LP	OK	37.1617	77.9725	1.06915	2.74359	0.0001	0.00234369	yes
151	MSTRG.10207	"NCU04274T0"	WT_DD	WT_LP	OK	90.3208	189.198	1.06676	2.73018	0.0001	0.00234369	yes
7066	MSTRG.6764	"NCU07911T0"	WT_DD	WT_LP	OK	9.32941	19.5298	1.06582	2.67608	0.0003	0.00584877	yes
8626	MSTRG.8656	"NCU04639T0"	WT_DD	WT_LP	OK	291.625	609.677	1.06393	2.46285	0.0004	0.007345	yes
1591	MSTRG.11869	"NCU05013T0"	WT_DD	WT_LP	OK	2.37214	4.94298	1.05919	2.19621	0.00285	0.0337162	yes
91	MSTRG.10132	"NCU04218T0"	WT_DD	WT_LP	OK	9.86879	20.53	1.05678	2.4227	0.00095	0.0145566	yes
76	MSTRG.10099	"NCU04193T0"	WT_DD	WT_LP	OK	30.9608	64.386	1.0563	2.68559	0.0002	0.00420033	yes
3826	MSTRG.2552	"NCU00678T0"	WT_DD	WT_LP	OK	6.24373	12.9796	1.05576	2.17551	0.0027	0.0323098	yes
3376	MSTRG.1996	"NCU07401T1"	WT_DD	WT_LP	OK	15.0841	31.2376	1.05025	2.56396	0.0004	0.007345	yes
7621	MSTRG.7502	"NCU04390T1"	WT_DD	WT_LP	OK	10.7576	22.242	1.04793	2.59626	0.0002	0.00420033	yes
2866	MSTRG.13163	"NCU05838T0"	WT_DD	WT_LP	OK	12.8178	26.4626	1.04581	2.52113	0.0004	0.007345	yes
6601	MSTRG.6354	"NCU08791T0"	WT_DD	WT_LP	OK	76.4893	157.833	1.04507	2.64071	0.00015	0.00331184	yes
706	MSTRG.10855	"NCU04814T0"	WT_DD	WT_LP	OK	38.6648	79.0529	1.0318	2.67086	0.00035	0.00660875	yes
1741	MSTRG.12027	"NCU09040T0"	WT_DD	WT_LP	OK	23.87	48.7723	1.03087	2.47376	0.00095	0.0145566	yes
841	MSTRG.11014	"NCU05600T0"	WT_DD	WT_LP	OK	7.12831	14.5149	1.0259	2.38942	0.00105	0.0157475	yes
541	MSTRG.10593	"NCU07081T0"	WT_DD	WT_LP	OK	16.4296	33.4522	1.0258	2.44377	0.0007	0.0115127	yes
7606	MSTRG.7472	"NCU04415T1"	WT_DD	WT_LP	OK	53.1086	108.039	1.02454	2.62465	0.0002	0.00420033	yes
4561	MSTRG.3627	"NCU03369T0"	WT_DD	WT_LP	OK	7.60157	15.4608	1.02424	2.15338	0.0028	0.0332335	yes
8431	MSTRG.8469	"NCU07741T0"	WT_DD	WT_LP	OK	16.3265	33.1415	1.02142	2.52268	0.00035	0.00660875	yes
2641	MSTRG.12988	"NCU08158T0"	WT_DD	WT_LP	OK	6.81952	13.8175	1.01875	2.24031	0.0013	0.0185843	yes
1711	MSTRG.12009	"NCU09031T0"	WT_DD	WT_LP	OK	8.83378	17.8896	1.01802	2.42644	0.0004	0.007345	yes
6421	MSTRG.6207	"NCU11367T0"	WT_DD	WT_LP	OK	17.5189	35.4764	1.01795	2.4699	0.00055	0.00950481	yes
7231	MSTRG.6898	"NCU06587T0"	WT_DD	WT_LP	OK	22.2775	45.0413	1.01566	2.30597	0.0018	0.0238961	yes
7801	MSTRG.7774	"NCU07333T0"	WT_DD	WT_LP	OK	7.38283	14.9043	1.01348	2.34371	0.00085	0.013367	yes
8656	MSTRG.8665	"NCU04635T0"	WT_DD	WT_LP	OK	19.6444	39.4945	1.00754	2.2752	0.00175	0.0233667	yes
8866	MSTRG.9024	"NCU03753T0"	WT_DD	WT_LP	OK	1059.66	2126.67	1.005	2.39476	0.00085	0.013367	yes
4186	MSTRG.3093	"NCU02819T2"	WT_DD	WT_LP	OK	15.4335	30.9417	1.00349	2.50104	0.0003	0.00584877	yes
2371	MSTRG.12688	"NCU02360T0"	WT_DD	WT_LP	OK	28.4848	56.7938	0.995542	2.49603	0.00045	0.00807047	yes
6676	MSTRG.6432	"NCU09647T0"	WT_DD	WT_LP	OK	19.4821	38.7939	0.993679	2.47702	0.00035	0.00660875	yes
2356	MSTRG.12669	"NCU02378T0"	WT_DD	WT_LP	OK	23.0649	45.8311	0.990629	2.59083	0.00015	0.00331184	yes
3811	MSTRG.2540	"NCU00684T0"	WT_DD	WT_LP	OK	15.4629	30.6568	0.987393	2.38714	0.0007	0.0115127	yes
4756	MSTRG.3948	"NCU11426T0"	WT_DD	WT_LP	OK	26.8294	53.0184	0.98268	2.56132	0.00045	0.00807047	yes
9031	MSTRG.9318	"NCU01154T1"	WT_DD	WT_LP	OK	7.99307	15.7929	0.982451	2.31636	0.00115	0.0169085	yes
3346	MSTRG.1924	"NCU09212T0"	WT_DD	WT_LP	OK	53.8703	106.315	0.98078	2.50393	0.0005	0.00879069	yes
3391	MSTRG.2073	"NCU07352T1"	WT_DD	WT_LP	OK	69.3906	136.175	0.97265	2.44188	0.00075	0.0121238	yes
3841	MSTRG.2567	"NCU00667T0"	WT_DD	WT_LP	OK	100.092	196.248	0.971347	2.47089	0.00045	0.00807047	yes
6976	MSTRG.670	"NCU01924T1"	WT_DD	WT_LP	OK	41.3035	80.4472	0.961777	2.47474	0.00065	0.01087	yes
3706	MSTRG.2429	"NCU00759T0"	WT_DD	WT_LP	OK	11.0821	21.543	0.958993	2.41189	0.0009	0.0139539	yes
2926	MSTRG.13186	"NCU05850T0"	WT_DD	WT_LP	OK	176.237	342.433	0.958306	2.31363	0.0012	0.0174659	yes
4921	MSTRG.4194	"NCU01654T0"	WT_DD	WT_LP	OK	24.3242	47.2495	0.957911	2.4892	0.00045	0.00807047	yes
676	MSTRG.10827	"NCU04796T0"	WT_DD	WT_LP	OK	15.5927	30.2611	0.956591	2.31101	0.00095	0.0145566	yes
1471	MSTRG.11722	"NCU05133T0"	WT_DD	WT_LP	OK	48.3523	93.5482	0.952124	2.41355	0.00045	0.00807047	yes
5836	MSTRG.5541	"NCU00132T0"	WT_DD	WT_LP	OK	24.9369	48.2245	0.951486	2.29071	0.0012	0.0174659	yes
361	MSTRG.10373	"NCU09846T0"	WT_DD	WT_LP	OK	6.3737	12.2206	0.939108	2.31252	0.00105	0.0157475	yes
4351	MSTRG.3188	"MSTRG.3188.1"	WT_DD	WT_LP	OK	1050.33	2009.29	0.93584	2.34523	0.001	0.0151522	yes
3931	MSTRG.2674	"NCU00589T0"	WT_DD	WT_LP	OK	47.1471	90.1275	0.934796	2.11854	0.003	0.0351008	yes
9316	MSTRG.9751	"NCU06682T0"	WT_DD	WT_LP	OK	91.7978	175.476	0.934739	2.37666	0.00095	0.0145566	yes
5446	MSTRG.4922	"NCU05735T0"	WT_DD	WT_LP	OK	19.6051	37.4483	0.933668	2.27782	0.0012	0.0174659	yes
8086	MSTRG.8115	"NCU05313T0"	WT_DD	WT_LP	OK	35.0585	66.9537	0.933397	2.30081	0.0013	0.0185843	yes
3586	MSTRG.2302	"NCU00868T0"	WT_DD	WT_LP	OK	26.4537	50.472	0.932015	2.34123	0.00095	0.0145566	yes
3361	MSTRG.1971	"NCU07425T1"	WT_DD	WT_LP	OK	33.5118	63.6189	0.924784	2.35121	0.00135	0.0191508	yes
1951	MSTRG.12108	"NCU06890T0"	WT_DD	WT_LP	OK	34.4007	65.1066	0.920366	2.14343	0.00265	0.0319068	yes
5866	MSTRG.5545	"NCU00135T1"	WT_DD	WT_LP	OK	51.0795	96.1406	0.9124	2.37242	0.0009	0.0139539	yes
6811	MSTRG.6537	"NCU04851T0"	WT_DD	WT_LP	OK	4.25595	8.00909	0.912156	2.11396	0.0029	0.0341472	yes
3106	MSTRG.1460	"NCU03112T0"	WT_DD	WT_LP	OK	175.479	329.144	0.907418	2.25724	0.0017	0.0228867	yes
2071	MSTRG.12192	"NCU09579T0"	WT_DD	WT_LP	OK	18.4455	34.4012	0.899195	2.21379	0.00145	0.02027	yes
2671	MSTRG.12996	"NCU08159T0"	WT_DD	WT_LP	OK	22.6957	42.3254	0.899104	2.35134	0.0006	0.0101835	yes
8101	MSTRG.8118	"NCU05309T0"	WT_DD	WT_LP	OK	30.6719	57.085	0.896193	2.20526	0.00205	0.0263925	yes
5416	MSTRG.4895	"NCU05714T0"	WT_DD	WT_LP	OK	18.9446	35.1112	0.890145	2.16884	0.0024	0.0297017	yes
2221	MSTRG.12417	"NCU06132T0"	WT_DD	WT_LP	OK	37.0206	68.5109	0.888006	2.16455	0.0025	0.0305862	yes
4651	MSTRG.3824	"NCU06847T0"	WT_DD	WT_LP	OK	10.3151	19.0684	0.886417	2.1698	0.00285	0.0337162	yes
406	MSTRG.10414	"NCU07234T0"	WT_DD	WT_LP	OK	22.7559	41.9266	0.881627	2.15753	0.0022	0.0278065	yes
7831	MSTRG.7780	"NCU16844T0"	WT_DD	WT_LP	OK	101.161	186.369	0.881505	2.21076	0.002	0.0259155	yes
3436	MSTRG.212	"NCU10008T0"	WT_DD	WT_LP	OK	86.9369	159.907	0.879189	2.25845	0.00135	0.0191508	yes
8056	MSTRG.8094	"NCU09931T0"	WT_DD	WT_LP	OK	37.3473	68.5407	0.875957	2.23676	0.0019	0.0248934	yes
661	MSTRG.1076	"NCU02661T0"	WT_DD	WT_LP	OK	17.0859	31.3346	0.874953	2.15888	0.0024	0.0297017	yes
6376	MSTRG.6168	"NCU07546T0"	WT_DD	WT_LP	OK	15.4656	28.3569	0.874639	2.28133	0.0013	0.0185843	yes
5746	MSTRG.5343	"NCU06277T0"	WT_DD	WT_LP	OK	33.8062	61.9679	0.874233	2.26062	0.0014	0.0197187	yes
691	MSTRG.10842	"NCU04805T0"	WT_DD	WT_LP	OK	93.2058	170.596	0.87209	2.2165	0.00165	0.0223859	yes
4891	MSTRG.4156	"NCU01698T0"	WT_DD	WT_LP	OK	69.3583	126.819	0.87063	2.17839	0.00245	0.0301521	yes
1696	MSTRG.11989	"NCU09992T0"	WT_DD	WT_LP	OK	44.6854	81.6342	0.869369	2.25276	0.00145	0.02027	yes
8716	MSTRG.8717	"NCU04603T0"	WT_DD	WT_LP	OK	59.6807	108.931	0.868078	2.20807	0.0017	0.0228867	yes
7996	MSTRG.7994	"NCU07024T0"	WT_DD	WT_LP	OK	104.604	190.914	0.867986	2.1482	0.0021	0.0268572	yes
4696	MSTRG.387	"NCU02094T1"	WT_DD	WT_LP	OK	18.5661	33.8824	0.867868	2.20573	0.00195	0.0254182	yes
9106	MSTRG.9449	"NCU01258T0"	WT_DD	WT_LP	OK	67.8342	123.175	0.860623	2.20042	0.00185	0.0244116	yes
3046	MSTRG.1397	"NCU03068T0"	WT_DD	WT_LP	OK	30.0518	54.5183	0.85929	2.12505	0.0025	0.0305862	yes
6241	MSTRG.588	"NCU01981T0"	WT_DD	WT_LP	OK	174.465	315.772	0.855944	2.13282	0.00225	0.0282707	yes
9376	MSTRG.9875	"MSTRG.9875.1"	WT_DD	WT_LP	OK	189.405	340.63	0.846727	2.16186	0.0019	0.0248934	yes
3466	MSTRG.2164	"NCU00955T0"	WT_DD	WT_LP	OK	70.3161	126.427	0.846384	2.11272	0.00235	0.0292398	yes
2776	MSTRG.13082	"NCU05778T0"	WT_DD	WT_LP	OK	40.5445	72.8698	0.845815	2.15433	0.00265	0.0319068	yes
5026	MSTRG.4362	"NCU01510T0"	WT_DD	WT_LP	OK	16.6767	29.755	0.835297	2.12571	0.0027	0.0323098	yes
1006	MSTRG.11162	"NCU05491T0"	WT_DD	WT_LP	OK	28.0468	50.0314	0.834998	2.16682	0.0021	0.0268572	yes
3736	MSTRG.249	"NCU09088T0"	WT_DD	WT_LP	OK	36.4528	64.3472	0.819846	2.13959	0.0017	0.0228867	yes
8641	MSTRG.8663	"NCU04636T0"	WT_DD	WT_LP	OK	39.3583	69.4618	0.819552	2.11657	0.0022	0.0278065	yes
6466	MSTRG.624	"NCU01953T0"	WT_DD	WT_LP	OK	38.8109	22.1905	-0.806521	-2.0493	0.00295	0.0346207	yes
1966	MSTRG.12128	"NCU06911T0"	WT_DD	WT_LP	OK	397.141	224.777	-0.821161	-2.11265	0.0028	0.0332335	yes
8836	MSTRG.8898	"NCU03667T0"	WT_DD	WT_LP	OK	35.781	20.2058	-0.824424	-2.09052	0.00285	0.0337162	yes
6061	MSTRG.5726	"NCU00263T0"	WT_DD	WT_LP	OK	32.6876	18.4383	-0.826036	-2.1253	0.0028	0.0332335	yes
8851	MSTRG.8924	"NCU03686T1"	WT_DD	WT_LP	OK	74.2699	41.8643	-0.827055	-2.13202	0.00245	0.0301521	yes
451	MSTRG.10458	"NCU07191T0"	WT_DD	WT_LP	OK	47.0683	26.3592	-0.836451	-2.18602	0.00205	0.0263925	yes
5221	MSTRG.4714	"NCU09485T0"	WT_DD	WT_LP	OK	33.6285	18.7268	-0.844582	-2.16977	0.0018	0.0238961	yes
5206	MSTRG.4697	"NCU09469T0"	WT_DD	WT_LP	OK	18.1564	10.0607	-0.851755	-2.1862	0.00235	0.0292398	yes
2941	MSTRG.13238	"NCU05895T0"	WT_DD	WT_LP	OK	18.4489	10.1338	-0.864359	-2.18208	0.0025	0.0305862	yes
1	MSTRG.10047	"NCU04161T0"	WT_DD	WT_LP	OK	14.5946	7.96842	-0.873073	-2.16728	0.0022	0.0278065	yes
6286	MSTRG.5975	"NCU00432T1"	WT_DD	WT_LP	OK	15.8521	8.63943	-0.875666	-2.24274	0.00145	0.02027	yes
811	MSTRG.1099	"NCU02671T0"	WT_DD	WT_LP	OK	42.9384	23.384	-0.876744	-2.26663	0.00145	0.02027	yes
6766	MSTRG.651	"NCU01938T1"	WT_DD	WT_LP	OK	34.647	18.8478	-0.878337	-2.20464	0.00195	0.0254182	yes
5761	MSTRG.5347	"NCU00003T0"	WT_DD	WT_LP	OK	76.3397	41.516	-0.878768	-2.16412	0.0027	0.0323098	yes
4336	MSTRG.3185	"NCU09266T0"	WT_DD	WT_LP	OK	29.44	15.9676	-0.882631	-2.22213	0.0021	0.0268572	yes
7501	MSTRG.7329	"NCU11295T0"	WT_DD	WT_LP	OK	23.8761	12.8865	-0.889705	-2.0695	0.00285	0.0337162	yes
5101	MSTRG.4439	"NCU08499T0"	WT_DD	WT_LP	OK	29.795	16.0641	-0.891231	-2.30863	0.0011	0.016344	yes
2206	MSTRG.12386	"NCU06153T0"	WT_DD	WT_LP	OK	22.4865	12.0851	-0.895828	-2.06972	0.0029	0.0341472	yes
2146	MSTRG.1231	"NCU02761T0"	WT_DD	WT_LP	OK	39.7992	21.145	-0.912423	-2.2826	0.00115	0.0169085	yes
8146	MSTRG.8138	"NCU05285T0"	WT_DD	WT_LP	OK	46.3768	24.5002	-0.920611	-2.39573	0.00085	0.013367	yes
6796	MSTRG.6531	"NCU07658T0"	WT_DD	WT_LP	OK	8.24	4.35147	-0.921143	-2.24735	0.0014	0.0197187	yes
4276	MSTRG.3149	"NCU02785T0"	WT_DD	WT_LP	OK	124.727	65.846	-0.921612	-2.38757	0.00135	0.0191508	yes
8536	MSTRG.8542	"NCU08889T1"	WT_DD	WT_LP	OK	15.6323	8.21502	-0.92819	-2.37995	0.0008	0.012757	yes
8041	MSTRG.8055	"NCU08816T0"	WT_DD	WT_LP	OK	23.8598	12.5294	-0.929261	-2.23484	0.00085	0.013367	yes
5671	MSTRG.5221	"NCU06199T0"	WT_DD	WT_LP	OK	27.7567	14.5293	-0.933868	-2.44614	0.00045	0.00807047	yes
8731	MSTRG.8741	"MSTRG.8741.1"	WT_DD	WT_LP	OK	5306.35	2773.1	-0.93622	-2.27768	0.00195	0.0254182	yes
4936	MSTRG.4200	"NCU01643T0"	WT_DD	WT_LP	OK	15.5261	8.1106	-0.936811	-2.27377	0.00145	0.02027	yes
481	MSTRG.10504	"NCU07159T0"	WT_DD	WT_LP	OK	168.718	87.8984	-0.940707	-2.42188	0.0003	0.00584877	yes
6316	MSTRG.601	"NCU01968T0"	WT_DD	WT_LP	OK	23.6772	12.3206	-0.942426	-2.37321	0.00075	0.0121238	yes
4996	MSTRG.4349	"NCU01517T0"	WT_DD	WT_LP	OK	30.0069	15.5399	-0.949317	-2.41963	0.0011	0.016344	yes
3571	MSTRG.2271	"NCU00894T0"	WT_DD	WT_LP	OK	28.3317	14.6715	-0.949402	-2.30952	0.0008	0.012757	yes
3196	MSTRG.1655	"NCU03253T0"	WT_DD	WT_LP	OK	49.2343	25.4738	-0.95065	-2.42167	0.00045	0.00807047	yes
2806	MSTRG.13122	"NCU05807T0"	WT_DD	WT_LP	OK	15.4274	7.9821	-0.950657	-2.38812	0.00085	0.013367	yes
8671	MSTRG.8683	"NCU04622T0"	WT_DD	WT_LP	OK	33.0116	17.0753	-0.951059	-2.35095	0.0008	0.012757	yes
2761	MSTRG.13080	"NCU05776T1"	WT_DD	WT_LP	OK	16.7024	8.6333	-0.952075	-2.2483	0.00145	0.02027	yes
1906	MSTRG.12064	"NCU11000T2"	WT_DD	WT_LP	OK	9.91732	5.10844	-0.957068	-2.21771	0.0025	0.0305862	yes
3676	MSTRG.2418	"NCU00772T1"	WT_DD	WT_LP	OK	11.3223	5.82168	-0.959657	-2.25147	0.0021	0.0268572	yes
5521	MSTRG.5000	"NCU07863T0"	WT_DD	WT_LP	OK	31.7798	16.339	-0.959789	-2.51729	0.0003	0.00584877	yes
9016	MSTRG.9292	"NCU01140T0"	WT_DD	WT_LP	OK	48.4573	24.8286	-0.964712	-2.46401	0.0006	0.0101835	yes
4471	MSTRG.3386	"NCU03550T0"	WT_DD	WT_LP	OK	40.8171	20.8392	-0.969876	-2.38252	0.00045	0.00807047	yes
8236	MSTRG.8249	"NCU05219T2"	WT_DD	WT_LP	OK	19.1302	9.75869	-0.971091	-2.44643	0.00035	0.00660875	yes
2551	MSTRG.12906	"NCU02209T0"	WT_DD	WT_LP	OK	266.183	135.738	-0.971591	-2.39029	0.00085	0.013367	yes
4036	MSTRG.2812	"NCU03043T0"	WT_DD	WT_LP	OK	48.5662	24.7462	-0.972748	-2.52517	0.0005	0.00879069	yes
5971	MSTRG.5664	"NCU00219T0"	WT_DD	WT_LP	OK	15.6772	7.97183	-0.975681	-2.50963	0.0002	0.00420033	yes
8161	MSTRG.8195	"NCU05257T0"	WT_DD	WT_LP	OK	76.4229	38.8419	-0.976391	-2.45668	0.0008	0.012757	yes
4906	MSTRG.4157	"NCU01689T1"	WT_DD	WT_LP	OK	103.91	52.639	-0.981132	-2.558	0.0005	0.00879069	yes
5491	MSTRG.4981	"NCU07850T0"	WT_DD	WT_LP	OK	71.1654	35.9673	-0.984489	-2.51869	0.0004	0.007345	yes
2791	MSTRG.13110	"NCU05801T0"	WT_DD	WT_LP	OK	13.0154	6.56765	-0.986766	-2.30633	0.00125	0.018034	yes
8506	MSTRG.8527	"NCU08898T0"	WT_DD	WT_LP	OK	24.1289	12.1708	-0.987341	-2.41865	0.00085	0.013367	yes
8341	MSTRG.8334	"NCU08869T0"	WT_DD	WT_LP	OK	15.9075	8.01109	-0.989635	-2.42701	0.0006	0.0101835	yes
1096	MSTRG.11233	"NCU03885T0"	WT_DD	WT_LP	OK	30.499	15.3561	-0.98995	-2.58062	0.00015	0.00331184	yes
5086	MSTRG.4405	"NCU01481T0"	WT_DD	WT_LP	OK	10.6788	5.36753	-0.992415	-2.21482	0.00175	0.0233667	yes
2431	MSTRG.12775	"NCU02302T0"	WT_DD	WT_LP	OK	25.8016	12.9585	-0.993561	-2.09765	0.0022	0.0278065	yes
4876	MSTRG.4138	"NCU01722T1"	WT_DD	WT_LP	OK	37.4359	18.7501	-0.997523	-2.63791	0.0001	0.00234369	yes
1651	MSTRG.11957	"NCU09432T0"	WT_DD	WT_LP	OK	15.4721	7.73781	-0.999672	-2.42965	0.001	0.0151522	yes
5686	MSTRG.5268	"NCU06230T0"	WT_DD	WT_LP	OK	239.095	119.396	-1.00184	-2.34951	0.0008	0.012757	yes
4081	MSTRG.2880	"NCU02988T0"	WT_DD	WT_LP	OK	13.9108	6.93241	-1.00478	-2.44109	0.00055	0.00950481	yes
4831	MSTRG.4053	"NCU01789T1"	WT_DD	WT_LP	OK	15.2901	7.61706	-1.00529	-2.56941	0.0002	0.00420033	yes
4501	MSTRG.3478	"NCU03488T0"	WT_DD	WT_LP	OK	91.6293	45.6018	-1.00672	-2.62118	0.0002	0.00420033	yes
3016	MSTRG.1372	"NCU09307T0"	WT_DD	WT_LP	OK	8.40393	4.18126	-1.00713	-2.29862	0.0011	0.016344	yes
3256	MSTRG.188	"NCU07438T0"	WT_DD	WT_LP	OK	10.8334	5.38609	-1.00817	-2.26113	0.00145	0.02027	yes
4231	MSTRG.3139	"NCU02794T0"	WT_DD	WT_LP	OK	12.7291	6.32007	-1.01012	-2.4755	0.00075	0.0121238	yes
8221	MSTRG.8245	"NCU05222T0"	WT_DD	WT_LP	OK	258.474	127.77	-1.01647	-2.56941	0.00045	0.00807047	yes
6631	MSTRG.6385	"NCU08776T0"	WT_DD	WT_LP	OK	16.5519	8.17065	-1.01848	-2.33846	0.00115	0.0169085	yes
8116	MSTRG.8125	"NCU05303T0"	WT_DD	WT_LP	OK	149.819	73.6416	-1.02463	-2.59158	0.00045	0.00807047	yes
9256	MSTRG.9731	"NCU06668T0"	WT_DD	WT_LP	OK	14.6775	7.20475	-1.02659	-2.56969	0.00055	0.00950481	yes
5071	MSTRG.4398	"NCU01487T0"	WT_DD	WT_LP	OK	164.437	80.5775	-1.02908	-2.59536	0.00035	0.00660875	yes
511	MSTRG.10590	"NCU07083T0"	WT_DD	WT_LP	OK	15.8685	7.77397	-1.02945	-2.36497	0.0011	0.016344	yes
7891	MSTRG.7852	"NCU07282T0"	WT_DD	WT_LP	OK	36.8267	18.0308	-1.03029	-2.61637	0.0001	0.00234369	yes
2416	MSTRG.12757	"NCU02316T1"	WT_DD	WT_LP	OK	15.8738	7.74603	-1.03512	-2.40556	0.00095	0.0145566	yes
646	MSTRG.10751	"NCU10518T1"	WT_DD	WT_LP	OK	21.1638	10.3266	-1.03524	-2.49356	0.0006	0.0101835	yes
4966	MSTRG.4252	"NCU01597T0"	WT_DD	WT_LP	OK	7.64901	3.73201	-1.03532	-2.55376	0.00035	0.00660875	yes
4261	MSTRG.3144	"NCU02789T0"	WT_DD	WT_LP	OK	3.94542	1.91893	-1.03988	-2.27345	0.00185	0.0244116	yes
5011	MSTRG.435	"NCU02096T0"	WT_DD	WT_LP	OK	30.8112	14.9713	-1.04125	-2.49789	0.0006	0.0101835	yes
3241	MSTRG.1865	"NCU08358T0"	WT_DD	WT_LP	OK	77.4759	37.6389	-1.04152	-2.58677	0.00035	0.00660875	yes
1921	MSTRG.12083	"NCU06868T0"	WT_DD	WT_LP	OK	11.1564	5.40284	-1.04609	-2.42373	0.00055	0.00950481	yes
4006	MSTRG.2736	"NCU00545T0"	WT_DD	WT_LP	OK	15.832	7.6529	-1.04876	-2.61654	0.0004	0.007345	yes
4726	MSTRG.3939	"NCU06738T0"	WT_DD	WT_LP	OK	20.5578	9.93207	-1.04952	-2.61438	0.0003	0.00584877	yes
8326	MSTRG.8333	"NCU08870T0"	WT_DD	WT_LP	OK	16.8264	8.11613	-1.05187	-2.46856	0.0004	0.007345	yes
9406	MSTRG.9920	"MSTRG.9920.1"	WT_DD	WT_LP	OK	12.8752	6.20375	-1.05338	-2.29392	0.00185	0.0244116	yes
5641	MSTRG.5210	"NCU06189T0"	WT_DD	WT_LP	OK	40.1266	19.3185	-1.05458	-2.62772	0.0003	0.00584877	yes
5371	MSTRG.4851	"NCU05680T0"	WT_DD	WT_LP	OK	25.139	12.1007	-1.05484	-2.62707	0.0003	0.00584877	yes
4306	MSTRG.3153	"NCU10282T0"	WT_DD	WT_LP	OK	9.36984	4.49456	-1.05984	-2.67619	0.0002	0.00420033	yes
6991	MSTRG.6709	"NCU07949T2"	WT_DD	WT_LP	OK	15.0257	7.1395	-1.07354	-2.54437	0.0006	0.0101835	yes
5236	MSTRG.4731	"NCU09492T2"	WT_DD	WT_LP	OK	17.4705	8.2837	-1.07657	-2.75698	5e-05	0.00128834	yes
5176	MSTRG.4631	"NCU09347T0"	WT_DD	WT_LP	OK	92.9178	43.9435	-1.0803	-2.75954	5e-05	0.00128834	yes
7486	MSTRG.7316	"NCU06290T0"	WT_DD	WT_LP	OK	29.3682	13.8731	-1.08196	-2.70659	0.0001	0.00234369	yes
4846	MSTRG.406	"NCU02086T0"	WT_DD	WT_LP	OK	13.7358	6.48046	-1.08378	-2.47938	0.00075	0.0121238	yes
6841	MSTRG.6581	"NCU11129T0"	WT_DD	WT_LP	OK	106.626	50.3043	-1.08381	-2.77782	0.0001	0.00234369	yes
2911	MSTRG.13179	"NCU05835T0"	WT_DD	WT_LP	OK	20.0427	9.43931	-1.08632	-2.59419	0.00025	0.00504322	yes
6826	MSTRG.6578	"NCU04885T0"	WT_DD	WT_LP	OK	9.34803	4.39973	-1.08725	-2.54374	0.0005	0.00879069	yes
5326	MSTRG.4779	"NCU09496T0"	WT_DD	WT_LP	OK	55.0518	25.9055	-1.08753	-2.80021	5e-05	0.00128834	yes
5281	MSTRG.4763	"NCU09504T0"	WT_DD	WT_LP	OK	20.134	9.42997	-1.09431	-2.61654	0.0002	0.00420033	yes
8821	MSTRG.8886	"NCU03651T1"	WT_DD	WT_LP	OK	62.4292	29.2192	-1.09531	-2.80188	5e-05	0.00128834	yes
8071	MSTRG.8106	"NCU09915T0"	WT_DD	WT_LP	OK	14.3048	6.67812	-1.09898	-2.57484	0.0003	0.00584877	yes
7426	MSTRG.7246	"NCU06344T0"	WT_DD	WT_LP	OK	37.0954	17.2974	-1.10069	-2.82483	5e-05	0.00128834	yes
6946	MSTRG.6653	"NCU04954T0"	WT_DD	WT_LP	OK	9.39267	4.3675	-1.10473	-2.40938	0.0005	0.00879069	yes
241	MSTRG.10302	"NCU08935T0"	WT_DD	WT_LP	OK	38.1337	17.7172	-1.10592	-2.75729	0.0002	0.00420033	yes
121	MSTRG.10163	"NCU04245T0"	WT_DD	WT_LP	OK	28.0496	13.0221	-1.10702	-2.747	0.0001	0.00234369	yes
3451	MSTRG.2144	"NCU00967T0"	WT_DD	WT_LP	OK	17.5592	8.11326	-1.11387	-2.41389	0.00045	0.00807047	yes
751	MSTRG.10903	"NCU04843T1"	WT_DD	WT_LP	OK	31.5134	14.5471	-1.11523	-2.39154	0.0008	0.012757	yes
7981	MSTRG.7976	"NCU07012T0"	WT_DD	WT_LP	OK	18.4232	8.48508	-1.11852	-2.83379	0.0001	0.00234369	yes
7111	MSTRG.6800	"NCU06521T0"	WT_DD	WT_LP	OK	10.051	4.62616	-1.11945	-2.37122	0.00105	0.0157475	yes
6916	MSTRG.6614	"NCU04924T1"	WT_DD	WT_LP	OK	133.554	61.3693	-1.12184	-2.86394	5e-05	0.00128834	yes
3091	MSTRG.1454	"NCU03107T0"	WT_DD	WT_LP	OK	26.8562	12.3269	-1.12345	-2.72239	0.00015	0.00331184	yes
4486	MSTRG.3466	"NCU03498T0"	WT_DD	WT_LP	OK	15.4706	7.06728	-1.1303	-2.57265	0.0006	0.0101835	yes
7966	MSTRG.7961	"NCU07002T0"	WT_DD	WT_LP	OK	12.3121	5.61832	-1.13187	-2.83667	5e-05	0.00128834	yes
631	MSTRG.10737	"NCU04738T0"	WT_DD	WT_LP	OK	10.708	4.88583	-1.13201	-2.702	0.0002	0.00420033	yes
4606	MSTRG.3757	"NCU10346T1"	WT_DD	WT_LP	OK	17.4127	7.91185	-1.13806	-2.94231	5e-05	0.00128834	yes
1891	MSTRG.12063	"NCU09063T0"	WT_DD	WT_LP	OK	9.41673	4.272	-1.14031	-2.76357	0.0003	0.00584877	yes
6481	MSTRG.6241	"NCU08217T0"	WT_DD	WT_LP	OK	12.0045	5.43463	-1.14332	-2.28467	0.00215	0.0273389	yes
8521	MSTRG.8529	"NCU08897T0"	WT_DD	WT_LP	OK	47.4158	21.4555	-1.14402	-2.84949	5e-05	0.00128834	yes
4096	MSTRG.2892	"NCU02977T0"	WT_DD	WT_LP	OK	153.708	69.5117	-1.14486	-2.93981	0.0001	0.00234369	yes
1261	MSTRG.11501	"NCU04088T0"	WT_DD	WT_LP	OK	16.8373	7.60658	-1.14634	-2.87422	5e-05	0.00128834	yes
5596	MSTRG.5181	"NCU06508T0"	WT_DD	WT_LP	OK	6.31522	2.84663	-1.14958	-2.49097	0.0005	0.00879069	yes
886	MSTRG.11047	"NCU05575T0"	WT_DD	WT_LP	OK	15.8265	7.11556	-1.15329	-2.89319	5e-05	0.00128834	yes
5716	MSTRG.5310	"NCU06255T0"	WT_DD	WT_LP	OK	18.9802	8.52114	-1.15537	-2.27928	0.0016	0.0218826	yes
8371	MSTRG.8367	"NCU08847T0"	WT_DD	WT_LP	OK	425.738	191.076	-1.15582	-2.49783	0.00035	0.00660875	yes
5146	MSTRG.4583	"NCU08423T1"	WT_DD	WT_LP	OK	17.4895	7.83491	-1.1585	-2.59577	0.0001	0.00234369	yes
9121	MSTRG.9506	"NCU01309T0"	WT_DD	WT_LP	OK	14.8825	6.62338	-1.16798	-2.78198	0.0001	0.00234369	yes
6736	MSTRG.6499	"NCU07618T0"	WT_DD	WT_LP	OK	15.4847	6.88993	-1.16829	-2.88763	5e-05	0.00128834	yes
5251	MSTRG.4761	"NCU09506T0"	WT_DD	WT_LP	OK	13.7588	6.11287	-1.17043	-2.32161	0.00205	0.0263925	yes
466	MSTRG.10486	"MSTRG.10486.1"	WT_DD	WT_LP	OK	218.311	96.7769	-1.17365	-2.75937	0.00015	0.00331184	yes
4591	MSTRG.3750	"NCU05404T0"	WT_DD	WT_LP	OK	267.284	118.455	-1.17404	-2.91376	0.00015	0.00331184	yes
2656	MSTRG.12992	"NCU08155T0"	WT_DD	WT_LP	OK	361.717	159.99	-1.17688	-2.90819	0.0001	0.00234369	yes
4741	MSTRG.3940	"NCU06737T0"	WT_DD	WT_LP	OK	36.4095	16.0023	-1.18603	-2.96865	5e-05	0.00128834	yes
5266	MSTRG.4762	"NCU09505T0"	WT_DD	WT_LP	OK	25.1098	11.0327	-1.18646	-2.80973	0.0001	0.00234369	yes
8746	MSTRG.8768	"NCU04570T0"	WT_DD	WT_LP	OK	14.5186	6.35982	-1.19084	-2.82886	5e-05	0.00128834	yes
1501	MSTRG.11737	"NCU05126T0"	WT_DD	WT_LP	OK	18.3069	8.00926	-1.19265	-2.37442	0.00115	0.0169085	yes
4066	MSTRG.2874	"NCU02994T0"	WT_DD	WT_LP	OK	19.0261	8.32051	-1.19323	-3.03877	5e-05	0.00128834	yes
2191	MSTRG.12375	"NCU12022T0"	WT_DD	WT_LP	OK	22.4275	9.80585	-1.19355	-2.47528	0.0008	0.012757	yes
7081	MSTRG.6786	"NCU07894T0"	WT_DD	WT_LP	OK	324.931	141.387	-1.20049	-2.58212	0.00055	0.00950481	yes
8941	MSTRG.9254	"MSTRG.9254.1"	WT_DD	WT_LP	OK	8.40667	3.64863	-1.20418	-2.35439	0.0011	0.016344	yes
5581	MSTRG.5152	"NCU06489T0"	WT_DD	WT_LP	OK	12.2988	5.33469	-1.20504	-2.57019	0.0006	0.0101835	yes
7441	MSTRG.7249	"NCU06341T1"	WT_DD	WT_LP	OK	11.6304	5.04191	-1.20586	-2.61409	0.00035	0.00660875	yes
8611	MSTRG.8623	"NCU04663T0"	WT_DD	WT_LP	OK	9.31489	4.02496	-1.21056	-2.78822	0.0001	0.00234369	yes
3751	MSTRG.2504	"NCU00712T0"	WT_DD	WT_LP	OK	42.4891	18.2124	-1.22217	-3.18123	5e-05	0.00128834	yes
6616	MSTRG.6364	"NCU08779T0"	WT_DD	WT_LP	OK	227.569	97.2265	-1.22688	-2.84937	0.00015	0.00331184	yes
7456	MSTRG.7269	"NCU06327T0"	WT_DD	WT_LP	OK	43.5498	18.59	-1.22814	-3.08443	5e-05	0.00128834	yes
166	MSTRG.10234	"NCU04291T0"	WT_DD	WT_LP	OK	11.6406	4.95299	-1.23279	-2.83566	0.0001	0.00234369	yes
436	MSTRG.10442	"NCU11348T0"	WT_DD	WT_LP	OK	375.734	159.83	-1.23317	-2.10297	0.002	0.0259155	yes
7396	MSTRG.7231	"NCU06358T0"	WT_DD	WT_LP	OK	7.27759	3.09558	-1.23325	-2.18801	0.00235	0.0292398	yes
5056	MSTRG.4386	"NCU01498T0"	WT_DD	WT_LP	OK	67.0383	28.4884	-1.23461	-2.639	0.0002	0.00420033	yes
5566	MSTRG.5105	"NCU06459T0"	WT_DD	WT_LP	OK	17.9685	7.57462	-1.24622	-3.12882	5e-05	0.00128834	yes
6166	MSTRG.5808	"NCU00321T0"	WT_DD	WT_LP	OK	17.3512	7.30826	-1.24744	-3.00946	0.0001	0.00234369	yes
4516	MSTRG.3498	"NCU03471T0"	WT_DD	WT_LP	OK	25.3736	10.6593	-1.25122	-3.02582	5e-05	0.00128834	yes
5776	MSTRG.5389	"NCU00040T0"	WT_DD	WT_LP	OK	48.5142	20.349	-1.25345	-3.19869	5e-05	0.00128834	yes
376	MSTRG.10376	"NCU09847T0"	WT_DD	WT_LP	OK	9.05403	3.77807	-1.26091	-2.5511	0.00045	0.00807047	yes
7216	MSTRG.6876	"NCU06579T0"	WT_DD	WT_LP	OK	6.26246	2.6045	-1.26573	-2.89634	5e-05	0.00128834	yes
586	MSTRG.10656	"NCU04692T0"	WT_DD	WT_LP	OK	5.67111	2.34735	-1.2726	-2.88219	5e-05	0.00128834	yes
616	MSTRG.10732	"NCU04732T0"	WT_DD	WT_LP	OK	16.3925	6.77338	-1.27509	-2.94461	5e-05	0.00128834	yes
2011	MSTRG.12157	"NCU06934T0"	WT_DD	WT_LP	OK	20.0016	8.23606	-1.28009	-2.94241	5e-05	0.00128834	yes
5731	MSTRG.5314	"NCU06262T0"	WT_DD	WT_LP	OK	10.5268	4.31042	-1.28816	-2.6403	0.0003	0.00584877	yes
2986	MSTRG.1341	"NCU09326T0"	WT_DD	WT_LP	OK	322.121	131.146	-1.29643	-3.18034	5e-05	0.00128834	yes
1516	MSTRG.11764	"NCU05079T0"	WT_DD	WT_LP	OK	64.7526	26.2169	-1.30444	-3.1786	5e-05	0.00128834	yes
2311	MSTRG.12545	"NCU06043T0"	WT_DD	WT_LP	OK	39.9181	16.0227	-1.31692	-3.19995	5e-05	0.00128834	yes
1216	MSTRG.11409	"NCU04018T0"	WT_DD	WT_LP	OK	2.9921	1.19903	-1.31928	-2.24379	0.0027	0.0323098	yes
6496	MSTRG.6253	"NCU08226T0"	WT_DD	WT_LP	OK	6.05222	2.42121	-1.32174	-2.46625	0.00075	0.0121238	yes
4546	MSTRG.3556	"NCU03426T0"	WT_DD	WT_LP	OK	11.7579	4.69019	-1.32592	-3.0701	5e-05	0.00128834	yes
2506	MSTRG.12853	"NCU02246T0"	WT_DD	WT_LP	OK	4.34926	1.73425	-1.32646	-2.547	0.00095	0.0145566	yes
3796	MSTRG.2530	"NCU00692T0"	WT_DD	WT_LP	OK	30.9732	12.3146	-1.33066	-3.13361	5e-05	0.00128834	yes
8176	MSTRG.8198	"NCU05255T0"	WT_DD	WT_LP	OK	16.5615	6.55152	-1.33793	-3.10573	5e-05	0.00128834	yes
2851	MSTRG.13145	"NCU05820T0"	WT_DD	WT_LP	OK	8.14867	3.21115	-1.34348	-2.65385	0.00065	0.01087	yes
1726	MSTRG.12012	"NCU09032T0"	WT_DD	WT_LP	OK	30.3807	11.8965	-1.35262	-3.31708	5e-05	0.00128834	yes
5791	MSTRG.5402	"MSTRG.5402.1"	WT_DD	WT_LP	OK	8.38158	3.27081	-1.35757	-2.91991	0.0001	0.00234369	yes
1351	MSTRG.11617	"NCU05956T0"	WT_DD	WT_LP	OK	7.36777	2.84772	-1.37142	-2.26109	0.00195	0.0254182	yes
5191	MSTRG.4670	"NCU09773T0"	WT_DD	WT_LP	OK	4.87671	1.86977	-1.38305	-2.48927	0.00135	0.0191508	yes
5626	MSTRG.5205	"NCU06185T0"	WT_DD	WT_LP	OK	191.317	72.8527	-1.39291	-3.52629	5e-05	0.00128834	yes
181	MSTRG.10237	"NCU04292T0"	WT_DD	WT_LP	OK	36.2323	13.7384	-1.39906	-3.48404	5e-05	0.00128834	yes
5656	MSTRG.5214	"NCU06196T0"	WT_DD	WT_LP	OK	28.8504	10.9098	-1.40296	-3.62093	5e-05	0.00128834	yes
1681	MSTRG.11981	"NCU09458T0"	WT_DD	WT_LP	OK	18.5996	6.99413	-1.41105	-3.16529	5e-05	0.00128834	yes
6361	MSTRG.6164	"NCU07553T0"	WT_DD	WT_LP	OK	12.793	4.80703	-1.41213	-3.05423	5e-05	0.00128834	yes
2026	MSTRG.12159	"NCU06935T0"	WT_DD	WT_LP	OK	6.82035	2.56092	-1.41318	-3.02682	0.0001	0.00234369	yes
7381	MSTRG.7210	"NCU06376T0"	WT_DD	WT_LP	OK	25.9723	9.57732	-1.43928	-2.23577	0.00265	0.0319068	yes
2716	MSTRG.13056	"NCU05753T0"	WT_DD	WT_LP	OK	8.67963	3.11151	-1.48002	-2.84679	0.00035	0.00660875	yes
7366	MSTRG.720	"NCU01893T0"	WT_DD	WT_LP	OK	28.9878	10.357	-1.48483	-3.62497	5e-05	0.00128834	yes
4861	MSTRG.4107	"NCU01752T0"	WT_DD	WT_LP	OK	100.689	35.8708	-1.48902	-2.93804	5e-05	0.00128834	yes
4201	MSTRG.311	"NCU10687T0"	WT_DD	WT_LP	OK	18.1787	6.46645	-1.49121	-3.5153	5e-05	0.00128834	yes
4291	MSTRG.3151	"NCU02793T1"	WT_DD	WT_LP	OK	25.6898	8.99352	-1.51424	-3.6961	5e-05	0.00128834	yes
2536	MSTRG.12869	"NCU02236T0"	WT_DD	WT_LP	OK	10.6688	3.73432	-1.51448	-3.11687	5e-05	0.00128834	yes
8446	MSTRG.8479	"NCU07736T0"	WT_DD	WT_LP	OK	33.1842	11.5861	-1.5181	-3.73321	5e-05	0.00128834	yes
4666	MSTRG.3842	"NCU06836T0"	WT_DD	WT_LP	OK	108.577	37.8215	-1.52144	-3.9435	5e-05	0.00128834	yes
8131	MSTRG.8131	"NCU05298T0"	WT_DD	WT_LP	OK	37.7247	13.0257	-1.53415	-3.30208	5e-05	0.00128834	yes
871	MSTRG.11041	"NCU05577T0"	WT_DD	WT_LP	OK	27.4582	9.38616	-1.54863	-2.63377	0.00065	0.01087	yes
7096	MSTRG.6789	"MSTRG.6789.1"	WT_DD	WT_LP	OK	51.8974	17.7126	-1.55089	-3.11447	5e-05	0.00128834	yes
1786	MSTRG.12036	"MSTRG.12036.1"	WT_DD	WT_LP	OK	5.31273	1.80567	-1.55692	-2.4275	0.00145	0.02027	yes
8461	MSTRG.8483	"NCU09824T1"	WT_DD	WT_LP	OK	14.1693	4.78174	-1.56716	-3.26707	5e-05	0.00128834	yes
4381	MSTRG.3230	"NCU09237T0"	WT_DD	WT_LP	OK	21.5787	7.24206	-1.57514	-3.73618	5e-05	0.00128834	yes
3856	MSTRG.2573	"MSTRG.2573.1"	WT_DD	WT_LP	OK	137.214	45.9991	-1.57675	-3.88875	5e-05	0.00128834	yes
226	MSTRG.10292	"NCU08927T0"	WT_DD	WT_LP	OK	41.0879	13.4182	-1.61452	-3.89488	5e-05	0.00128834	yes
961	MSTRG.11076	"MSTRG.11076.1"	WT_DD	WT_LP	OK	206.71	67.2837	-1.61928	-3.96131	5e-05	0.00128834	yes
6706	MSTRG.6485	"NCU11363T0"	WT_DD	WT_LP	OK	9.40666	3.04298	-1.6282	-3.09906	5e-05	0.00128834	yes
1816	MSTRG.12040	"NCU09048T0"	WT_DD	WT_LP	OK	21.7346	6.98668	-1.63732	-4.10389	5e-05	0.00128834	yes
9151	MSTRG.9575	"NCU11138T0"	WT_DD	WT_LP	OK	4.95125	1.58177	-1.64625	-3.57823	5e-05	0.00128834	yes
8206	MSTRG.8231	"NCU05232T0"	WT_DD	WT_LP	OK	7.65651	2.44315	-1.64795	-3.40023	5e-05	0.00128834	yes
391	MSTRG.10386	"NCU09858T0"	WT_DD	WT_LP	OK	8.55088	2.72402	-1.65034	-3.05765	5e-05	0.00128834	yes
7546	MSTRG.7400	"NCU04472T1"	WT_DD	WT_LP	OK	66.6919	21.1988	-1.65353	-4.12198	5e-05	0.00128834	yes
8686	MSTRG.8689	"NCU04618T0"	WT_DD	WT_LP	OK	6.73346	2.13016	-1.66039	-3.33764	5e-05	0.00128834	yes
5506	MSTRG.499	"NCU02046T0"	WT_DD	WT_LP	OK	26.0466	8.18584	-1.66989	-4.00997	5e-05	0.00128834	yes
9046	MSTRG.9320	"NCU01156T0"	WT_DD	WT_LP	OK	2.17947	0.682768	-1.67451	-2.44639	0.00255	0.0310675	yes
8596	MSTRG.8620	"MSTRG.8620.1"	WT_DD	WT_LP	OK	6.658	2.08442	-1.67544	-2.55673	0.0013	0.0185843	yes
4051	MSTRG.284	"NCU02184T1"	WT_DD	WT_LP	OK	19.6703	6.13205	-1.68158	-4.15785	5e-05	0.00128834	yes
6331	MSTRG.6107	"NCU09007T0"	WT_DD	WT_LP	OK	3.80297	1.17676	-1.69231	-3.4353	5e-05	0.00128834	yes
5896	MSTRG.5558	"NCU00142T0"	WT_DD	WT_LP	OK	5.2161	1.58534	-1.71818	-3.25526	5e-05	0.00128834	yes
826	MSTRG.11	"NCU09909T0"	WT_DD	WT_LP	OK	3.57164	1.06689	-1.74318	-2.77693	0.0002	0.00420033	yes
1561	MSTRG.11814	"NCU05057T0"	WT_DD	WT_LP	OK	7.23639	2.15682	-1.74637	-2.77693	0.00045	0.00807047	yes
1801	MSTRG.12037	"MSTRG.12037.1"	WT_DD	WT_LP	OK	13.8153	4.09638	-1.75385	-2.95715	0.0002	0.00420033	yes
3496	MSTRG.2197	"NCU00935T0"	WT_DD	WT_LP	OK	54.5564	16.0254	-1.76739	-3.09654	0.0002	0.00420033	yes
4951	MSTRG.4210	"NCU16561T0"	WT_DD	WT_LP	OK	5.91058	1.71169	-1.78788	-2.32987	0.00175	0.0233667	yes
7786	MSTRG.7772	"NCU07334T0"	WT_DD	WT_LP	OK	25.4529	7.12386	-1.8371	-4.17112	5e-05	0.00128834	yes
6346	MSTRG.6110	"NCU09010T0"	WT_DD	WT_LP	OK	219.511	59.932	-1.8729	-4.48286	5e-05	0.00128834	yes
8251	MSTRG.8253	"NCU05217T0"	WT_DD	WT_LP	OK	4.03384	1.02848	-1.97164	-2.93825	0.0004	0.007345	yes
7906	MSTRG.7859	"NCU07277T0"	WT_DD	WT_LP	OK	117.77	29.0932	-2.01723	-5.10168	5e-05	0.00128834	yes
2626	MSTRG.12965	"NCU08137T0"	WT_DD	WT_LP	OK	106.954	25.9748	-2.0418	-5.11902	5e-05	0.00128834	yes
496	MSTRG.10526	"NCU17055T0"	WT_DD	WT_LP	OK	38.2905	9.03799	-2.08291	-4.31684	5e-05	0.00128834	yes
3646	MSTRG.2362	"NCU00821T0"	WT_DD	WT_LP	OK	81.5792	17.331	-2.23485	-5.69936	5e-05	0.00128834	yes
5131	MSTRG.4544	"MSTRG.4544.1"	WT_DD	WT_LP	OK	83.2692	17.6231	-2.24032	-3.64161	0.0001	0.00234369	yes
2086	MSTRG.12224	"NCU08397T0"	WT_DD	WT_LP	OK	160.468	30.6238	-2.38956	-6.01256	5e-05	0.00128834	yes
1366	MSTRG.11624	"NCU05948T1"	WT_DD	WT_LP	OK	39.864	7.16823	-2.4754	-5.58128	5e-05	0.00128834	yes
5311	MSTRG.4777	"NCU09497T0"	WT_DD	WT_LP	OK	59.4899	9.534	-2.64149	-6.08237	5e-05	0.00128834	yes

## Sheet: set1
	gene_id	NCU	sample_1	sample_2	status	value_1(FPKM)	value_2(FPKM)	log2_fold_change	test_stat	p_value	q_value	significant
1785	MSTRG.4496	"NCU08699T0"	Set1_DD	Set1_LP	OK	0.924543	324.52	8.45535	11.3561	5e-05	0.00128834	yes
1380	MSTRG.2720	"NCU00552T0"	Set1_DD	Set1_LP	OK	4.72679	1006.66	7.7345	15.6533	5e-05	0.00128834	yes
2355	MSTRG.6392	"NCU08769T0"	Set1_DD	Set1_LP	OK	3.52495	694.246	7.6217	6.72912	0.0003	0.00584877	yes
975	MSTRG.12939	"NCU02190T0"	Set1_DD	Set1_LP	OK	0.895358	141.486	7.30398	10.5365	5e-05	0.00128834	yes
1365	MSTRG.2680	"NCU00582T0"	Set1_DD	Set1_LP	OK	3.10885	329.941	6.72969	14.397	5e-05	0.00128834	yes
465	MSTRG.11340	"NCU03967T0"	Set1_DD	Set1_LP	OK	6.96337	686.568	6.62347	13.8064	5e-05	0.00128834	yes
2910	MSTRG.7786	"NCU07325T0"	Set1_DD	Set1_LP	OK	4.35077	314.077	6.17371	10.5739	5e-05	0.00128834	yes
1170	MSTRG.192	"NCU07434T0"	Set1_DD	Set1_LP	OK	1.05612	51.2769	5.60147	8.85834	5e-05	0.00128834	yes
150	MSTRG.10357	"NCU10063T0"	Set1_DD	Set1_LP	OK	3.94431	188.43	5.57811	1.15042	0.00045	0.00807047	yes
1515	MSTRG.3288	"NCU08626T0"	Set1_DD	Set1_LP	OK	3.81145	142.049	5.21991	11.0525	5e-05	0.00128834	yes
1320	MSTRG.2664	"NCU00585T0"	Set1_DD	Set1_LP	OK	26.0369	777.858	4.90088	11.0249	5e-05	0.00128834	yes
3105	MSTRG.832	"MSTRG.832.1"	Set1_DD	Set1_LP	OK	2.22608	60.3582	4.76097	8.65395	5e-05	0.00128834	yes
2325	MSTRG.6326	"NCU08533T0"	Set1_DD	Set1_LP	OK	0.397301	10.4325	4.71471	3.17404	0.0001	0.00234369	yes
3195	MSTRG.8488	"NCU09830T0"	Set1_DD	Set1_LP	OK	3.10787	66.7337	4.42442	9.96514	5e-05	0.00128834	yes
2385	MSTRG.6472	"NCU07585T0"	Set1_DD	Set1_LP	OK	11.1438	237.851	4.41574	10.165	5e-05	0.00128834	yes
750	MSTRG.12136	"NCU06915T0"	Set1_DD	Set1_LP	OK	12.3379	242.414	4.2963	4.35277	5e-05	0.00128834	yes
2790	MSTRG.7425	"NCU04452T0"	Set1_DD	Set1_LP	OK	44.3851	799.033	4.17011	9.96732	5e-05	0.00128834	yes
690	MSTRG.12041	"NCU09049T0"	Set1_DD	Set1_LP	OK	4.57737	73.9777	4.0145	8.21103	5e-05	0.00128834	yes
1935	MSTRG.5062	"NCU06420T0"	Set1_DD	Set1_LP	OK	26.7537	423.498	3.98455	9.51772	5e-05	0.00128834	yes
3075	MSTRG.8050	"NCU08824T0"	Set1_DD	Set1_LP	OK	20.4221	301.913	3.88593	9.46455	5e-05	0.00128834	yes
480	MSTRG.11350	"NCU17113T0"	Set1_DD	Set1_LP	OK	2.90318	41.2366	3.82822	3.70811	0.00055	0.00950481	yes
3150	MSTRG.8356	"NCU08850T0"	Set1_DD	Set1_LP	OK	3.30724	43.1806	3.70668	8.41908	5e-05	0.00128834	yes
2760	MSTRG.7298	"NCU06306T0"	Set1_DD	Set1_LP	OK	4.06693	51.2633	3.65591	8.40327	5e-05	0.00128834	yes
3330	MSTRG.9140	"NCU00999T0"	Set1_DD	Set1_LP	OK	32.0654	381.275	3.57174	8.49585	5e-05	0.00128834	yes
2070	MSTRG.5705	"NCU00244T0"	Set1_DD	Set1_LP	OK	4.09724	48.4813	3.5647	7.48558	5e-05	0.00128834	yes
3525	MSTRG.9671	"NCU01427T0"	Set1_DD	Set1_LP	OK	14.1252	159.953	3.5013	5.54683	5e-05	0.00128834	yes
1455	MSTRG.3123	"NCU02801T0"	Set1_DD	Set1_LP	OK	14.9906	169.523	3.49935	7.20539	5e-05	0.00128834	yes
630	MSTRG.11905	"NCU11424T0"	Set1_DD	Set1_LP	OK	16.5062	178.279	3.43306	8.26428	5e-05	0.00128834	yes
2475	MSTRG.6651	"NCU04950T1"	Set1_DD	Set1_LP	OK	2.21743	23.5406	3.40819	3.31653	0.00105	0.0157475	yes
930	MSTRG.12826	"MSTRG.12826.3"	Set1_DD	Set1_LP	OK	2.38752	25.1703	3.39814	4.23324	5e-05	0.00128834	yes
300	MSTRG.11021	"NCU05594T0"	Set1_DD	Set1_LP	OK	27.3968	279.557	3.35106	6.70117	5e-05	0.00128834	yes
720	MSTRG.12045	"NCU11395T0"	Set1_DD	Set1_LP	OK	14.9914	143.59	3.25975	7.82069	5e-05	0.00128834	yes
3015	MSTRG.7873	"NCU07267T0"	Set1_DD	Set1_LP	OK	71.6988	685.979	3.25814	7.12394	5e-05	0.00128834	yes
2280	MSTRG.6298	"NCU08557T0"	Set1_DD	Set1_LP	OK	2.57259	22.7629	3.14539	4.18835	5e-05	0.00128834	yes
2685	MSTRG.7136	"NCU08291T0"	Set1_DD	Set1_LP	OK	37.9561	331.159	3.12512	7.78521	5e-05	0.00128834	yes
3360	MSTRG.9246	"NCU01089T1"	Set1_DD	Set1_LP	OK	8.69602	70.4874	3.01894	7.20568	5e-05	0.00128834	yes
2865	MSTRG.769	"NCU01861T0"	Set1_DD	Set1_LP	OK	16.76	135.565	3.01589	6.56594	5e-05	0.00128834	yes
2130	MSTRG.5866	"NCU00360T0"	Set1_DD	Set1_LP	OK	11.9334	92.7824	2.95885	5.60645	5e-05	0.00128834	yes
1035	MSTRG.13173	"NCU05844T0"	Set1_DD	Set1_LP	OK	8.16692	60.8257	2.89682	5.71533	5e-05	0.00128834	yes
3345	MSTRG.9204	"NCU01060T0"	Set1_DD	Set1_LP	OK	34.1595	253.261	2.89026	6.83331	5e-05	0.00128834	yes
1155	MSTRG.1919	"NCU09210T0"	Set1_DD	Set1_LP	OK	2.93543	21.076	2.84396	5.7636	5e-05	0.00128834	yes
2055	MSTRG.5695	"NCU00236T0"	Set1_DD	Set1_LP	OK	11.5428	81.6129	2.8218	6.65197	5e-05	0.00128834	yes
3000	MSTRG.7866	"NCU07264T0"	Set1_DD	Set1_LP	OK	13.7862	92.3116	2.74329	5.04901	5e-05	0.00128834	yes
2220	MSTRG.6181	"NCU07541T0"	Set1_DD	Set1_LP	OK	10.9709	72.9714	2.73365	5.88923	5e-05	0.00128834	yes
2610	MSTRG.6851	"NCU06553T0"	Set1_DD	Set1_LP	OK	5.07968	33.5499	2.7235	4.15857	5e-05	0.00128834	yes
945	MSTRG.12827	"NCU02265T2"	Set1_DD	Set1_LP	OK	10.1012	64.2305	2.66873	5.6029	5e-05	0.00128834	yes
735	MSTRG.12058	"NCU09057T0"	Set1_DD	Set1_LP	OK	27.2928	169.843	2.63761	5.07112	5e-05	0.00128834	yes
3210	MSTRG.8489	"NCU09829T0"	Set1_DD	Set1_LP	OK	5.04323	30.0159	2.57331	5.77782	5e-05	0.00128834	yes
3555	MSTRG.972	"NCU02596T0"	Set1_DD	Set1_LP	OK	25.4709	149.898	2.55706	6.15859	5e-05	0.00128834	yes
2235	MSTRG.6182	"MSTRG.6182.1"	Set1_DD	Set1_LP	OK	0.865438	4.99933	2.53023	3.48473	0.0001	0.00234369	yes
345	MSTRG.11058	"NCU05567T0"	Set1_DD	Set1_LP	OK	26.4327	149.35	2.4983	5.615	5e-05	0.00128834	yes
915	MSTRG.12804	"MSTRG.12804.1"	Set1_DD	Set1_LP	OK	0.56619	3.14284	2.47271	3.11217	0.00075	0.0121238	yes
2655	MSTRG.6906	"NCU06597T0"	Set1_DD	Set1_LP	OK	42.2691	233.748	2.46728	5.48136	5e-05	0.00128834	yes
525	MSTRG.1156	"NCU02713T0"	Set1_DD	Set1_LP	OK	36.8174	202.567	2.45994	6.15769	5e-05	0.00128834	yes
240	MSTRG.10868	"NCU04823T1"	Set1_DD	Set1_LP	OK	10.6888	57.9043	2.43757	5.68514	5e-05	0.00128834	yes
1125	MSTRG.1808	"NCU09141T0"	Set1_DD	Set1_LP	OK	34.0295	180.888	2.41023	5.85696	5e-05	0.00128834	yes
3420	MSTRG.9285	"NCU01127T0"	Set1_DD	Set1_LP	OK	12.0111	61.1904	2.34894	5.3818	5e-05	0.00128834	yes
360	MSTRG.11065	"MSTRG.11065.2"	Set1_DD	Set1_LP	OK	1.42377	7.00856	2.2994	3.55241	0.0002	0.00420033	yes
3405	MSTRG.9283	"NCU01124T0"	Set1_DD	Set1_LP	OK	12.1788	59.918	2.29862	5.46454	5e-05	0.00128834	yes
570	MSTRG.11704	"NCU05143T0"	Set1_DD	Set1_LP	OK	3.15775	14.5628	2.20532	4.49477	5e-05	0.00128834	yes
2310	MSTRG.6311	"NCU16710T0"	Set1_DD	Set1_LP	OK	6.37255	29.1483	2.19347	4.11503	5e-05	0.00128834	yes
2085	MSTRG.5752	"NCU00276T0"	Set1_DD	Set1_LP	OK	4.61552	20.7987	2.17193	5.25508	5e-05	0.00128834	yes
1350	MSTRG.2678	"NCU00586T0"	Set1_DD	Set1_LP	OK	22.2965	98.6894	2.14608	5.39063	5e-05	0.00128834	yes
270	MSTRG.10954	"NCU05652T0"	Set1_DD	Set1_LP	OK	11.9968	51.6994	2.1075	4.33672	5e-05	0.00128834	yes
2925	MSTRG.7790	"NCU07323T0"	Set1_DD	Set1_LP	OK	1.08327	4.66284	2.10581	2.82425	5e-05	0.00128834	yes
30	MSTRG.10073	"MSTRG.10073.1"	Set1_DD	Set1_LP	OK	1.29	5.53554	2.10135	3.15755	5e-05	0.00128834	yes
795	MSTRG.12428	"NCU06125T0"	Set1_DD	Set1_LP	OK	40.6295	170.001	2.06494	5.29633	5e-05	0.00128834	yes
870	MSTRG.12706	"NCU02356T0"	Set1_DD	Set1_LP	OK	22.5218	94.0949	2.06279	5.23519	5e-05	0.00128834	yes
705	MSTRG.12043	"MSTRG.12043.1"	Set1_DD	Set1_LP	OK	2.71052	10.5271	1.95746	3.70919	5e-05	0.00128834	yes
1530	MSTRG.3329	"NCU09615T0"	Set1_DD	Set1_LP	OK	5.7179	21.8623	1.93489	4.43843	5e-05	0.00128834	yes
135	MSTRG.10351	"NCU09841T0"	Set1_DD	Set1_LP	OK	21.3032	80.1969	1.91247	4.52305	5e-05	0.00128834	yes
495	MSTRG.11485	"NCU04076T0"	Set1_DD	Set1_LP	OK	2.40356	8.93198	1.89381	3.01302	5e-05	0.00128834	yes
1500	MSTRG.3233	"NCU09235T0"	Set1_DD	Set1_LP	OK	18.869	69.2584	1.87597	4.21221	5e-05	0.00128834	yes
1905	MSTRG.4962	"NCU07837T0"	Set1_DD	Set1_LP	OK	11.117	40.5871	1.86826	4.78148	5e-05	0.00128834	yes
1005	MSTRG.13023	"NCU08173T0"	Set1_DD	Set1_LP	OK	3.77466	13.7615	1.86622	3.57838	5e-05	0.00128834	yes
2040	MSTRG.5643	"NCU00203T0"	Set1_DD	Set1_LP	OK	21.7198	77.8825	1.84229	3.98172	5e-05	0.00128834	yes
810	MSTRG.12469	"NCU06095T1"	Set1_DD	Set1_LP	OK	28.8173	102.924	1.83658	4.76663	5e-05	0.00128834	yes
1245	MSTRG.2330	"NCU00838T0"	Set1_DD	Set1_LP	OK	25.1116	89.6491	1.83593	4.49298	5e-05	0.00128834	yes
2550	MSTRG.6755	"NCU07921T0"	Set1_DD	Set1_LP	OK	19.0901	68.067	1.83413	3.88105	5e-05	0.00128834	yes
1095	MSTRG.1519	"NCU16387T0"	Set1_DD	Set1_LP	OK	0.906685	3.22469	1.83049	2.30448	0.00105	0.0157475	yes
2820	MSTRG.7537	"NCU04368T0"	Set1_DD	Set1_LP	OK	28.3304	99.5036	1.8124	4.55659	5e-05	0.00128834	yes
1920	MSTRG.5042	"NCU06407T0"	Set1_DD	Set1_LP	OK	17.4141	60.7577	1.80281	4.62168	5e-05	0.00128834	yes
2580	MSTRG.682	"NCU11201T0"	Set1_DD	Set1_LP	OK	7.63317	26.6002	1.80108	3.75169	5e-05	0.00128834	yes
2445	MSTRG.6600	"NCU04908T0"	Set1_DD	Set1_LP	OK	19.4845	67.308	1.78845	2.84704	0.00015	0.00331184	yes
1140	MSTRG.184	"NCU07441T0"	Set1_DD	Set1_LP	OK	4.26132	14.5448	1.77113	3.04424	5e-05	0.00128834	yes
540	MSTRG.11609	"MSTRG.11609.1"	Set1_DD	Set1_LP	OK	3.22442	10.8354	1.74864	3.62686	5e-05	0.00128834	yes
3540	MSTRG.9710	"NCU06655T0"	Set1_DD	Set1_LP	OK	6.95501	23.351	1.74736	4.04712	5e-05	0.00128834	yes
1065	MSTRG.1336	"NCU09820T0"	Set1_DD	Set1_LP	OK	98.6696	328.051	1.73324	3.75758	5e-05	0.00128834	yes
1335	MSTRG.2666	"NCU00584T0"	Set1_DD	Set1_LP	OK	34.8729	115.36	1.72597	4.25787	5e-05	0.00128834	yes
2400	MSTRG.6522	"NCU07626T0"	Set1_DD	Set1_LP	OK	3.99148	13.1538	1.72048	2.89703	0.0003	0.00584877	yes
885	MSTRG.12749	"NCU02322T0"	Set1_DD	Set1_LP	OK	6.25403	20.2814	1.6973	3.64385	5e-05	0.00128834	yes
2625	MSTRG.6855	"NCU06554T0"	Set1_DD	Set1_LP	OK	30.4573	98.6924	1.69615	4.3252	5e-05	0.00128834	yes
2955	MSTRG.7799	"NCU07314T1"	Set1_DD	Set1_LP	OK	4.86557	15.7099	1.69099	3.91694	5e-05	0.00128834	yes
180	MSTRG.10592	"NCU07082T0"	Set1_DD	Set1_LP	OK	9.42116	29.8175	1.66218	4.12221	5e-05	0.00128834	yes
2595	MSTRG.6842	"NCU06549T0"	Set1_DD	Set1_LP	OK	64.0813	201.423	1.65226	4.23927	5e-05	0.00128834	yes
330	MSTRG.11054	"MSTRG.11054.1"	Set1_DD	Set1_LP	OK	135.102	422.831	1.64603	3.9003	5e-05	0.00128834	yes
435	MSTRG.1127	"NCU02691T1"	Set1_DD	Set1_LP	OK	6.92802	21.6747	1.6455	3.53573	5e-05	0.00128834	yes
2025	MSTRG.560	"NCU01997T0"	Set1_DD	Set1_LP	OK	17.5082	54.6553	1.64233	4.20925	5e-05	0.00128834	yes
2295	MSTRG.6309	"NCU08549T0"	Set1_DD	Set1_LP	OK	22.6234	70.5872	1.64159	3.85553	5e-05	0.00128834	yes
1680	MSTRG.3925	"NCU06751T0"	Set1_DD	Set1_LP	OK	12.3196	38.3652	1.63884	2.76028	0.0005	0.00879069	yes
2535	MSTRG.6751	"NCU07923T0"	Set1_DD	Set1_LP	OK	5.83674	18.1527	1.63695	3.37304	5e-05	0.00128834	yes
1890	MSTRG.4902	"NCU05721T0"	Set1_DD	Set1_LP	OK	12.5921	39.1296	1.63574	4.2174	5e-05	0.00128834	yes
1770	MSTRG.4277	"NCU01579T0"	Set1_DD	Set1_LP	OK	6.76231	20.9464	1.63111	2.62243	0.00085	0.013367	yes
390	MSTRG.112	"NCU07498T0"	Set1_DD	Set1_LP	OK	12.3549	37.8286	1.61439	4.14948	5e-05	0.00128834	yes
1875	MSTRG.4856	"NCU05683T0"	Set1_DD	Set1_LP	OK	9.52512	29.1489	1.61363	3.94491	5e-05	0.00128834	yes
3270	MSTRG.8880	"NCU03647T0"	Set1_DD	Set1_LP	OK	6.05982	18.3502	1.59845	3.93148	5e-05	0.00128834	yes
60	MSTRG.10192	"NCU04266T0"	Set1_DD	Set1_LP	OK	159.298	482.367	1.5984	3.98429	5e-05	0.00128834	yes
1980	MSTRG.5270	"NCU06231T0"	Set1_DD	Set1_LP	OK	15.0119	45.3257	1.59422	4.07445	5e-05	0.00128834	yes
645	MSTRG.11979	"NCU09451T0"	Set1_DD	Set1_LP	OK	1.38881	4.18715	1.59212	2.59199	0.00095	0.0145566	yes
225	MSTRG.10842	"NCU04805T0"	Set1_DD	Set1_LP	OK	66.5317	199.557	1.58469	3.99667	5e-05	0.00128834	yes
90	MSTRG.1027	"NCU02636T0"	Set1_DD	Set1_LP	OK	11.2548	33.2856	1.56435	3.65214	5e-05	0.00128834	yes
3255	MSTRG.8786	"NCU04560T0"	Set1_DD	Set1_LP	OK	3.45834	10.0958	1.5456	3.17459	5e-05	0.00128834	yes
1215	MSTRG.2177	"NCU00939T0"	Set1_DD	Set1_LP	OK	33.9146	98.8564	1.54343	3.7975	5e-05	0.00128834	yes
3570	MSTRG.9829	"NCU09534T0"	Set1_DD	Set1_LP	OK	39.0931	113.148	1.53323	3.10587	5e-05	0.00128834	yes
45	MSTRG.10079	"NCU04179T0"	Set1_DD	Set1_LP	OK	16.166	46.6401	1.5286	3.90038	5e-05	0.00128834	yes
3465	MSTRG.9359	"NCU01188T0"	Set1_DD	Set1_LP	OK	14.2724	40.9789	1.52165	3.70986	5e-05	0.00128834	yes
1860	MSTRG.4855	"MSTRG.4855.1"	Set1_DD	Set1_LP	OK	1.92187	5.49381	1.5153	2.90276	0.0001	0.00234369	yes
375	MSTRG.11170	"NCU10011T0"	Set1_DD	Set1_LP	OK	37.9794	108.342	1.51231	3.94072	5e-05	0.00128834	yes
3390	MSTRG.9273	"NCU01112T0"	Set1_DD	Set1_LP	OK	12.2785	34.7423	1.50056	3.14932	5e-05	0.00128834	yes
3120	MSTRG.8331	"NCU10291T0"	Set1_DD	Set1_LP	OK	2.66207	7.4779	1.49009	3.01854	5e-05	0.00128834	yes
3135	MSTRG.8352	"NCU08856T0"	Set1_DD	Set1_LP	OK	20.597	56.523	1.4564	3.60952	5e-05	0.00128834	yes
1665	MSTRG.3865	"NCU06803T0"	Set1_DD	Set1_LP	OK	12.2814	33.2408	1.43648	2.78671	0.0003	0.00584877	yes
1440	MSTRG.3086	"MSTRG.3086.1"	Set1_DD	Set1_LP	OK	2.73417	7.38367	1.43323	2.44286	0.001	0.0151522	yes
3510	MSTRG.9663	"NCU01422T0"	Set1_DD	Set1_LP	OK	150.59	405.13	1.42776	3.53104	5e-05	0.00128834	yes
2415	MSTRG.6537	"NCU04851T0"	Set1_DD	Set1_LP	OK	4.91419	13.135	1.41839	3.3971	5e-05	0.00128834	yes
1815	MSTRG.4557	"NCU08402T0"	Set1_DD	Set1_LP	OK	7.5215	19.3001	1.35951	2.78073	0.0003	0.00584877	yes
1110	MSTRG.1771	"NCU10852T1"	Set1_DD	Set1_LP	OK	7.47592	18.4705	1.3049	2.51009	0.00075	0.0121238	yes
1710	MSTRG.4016	"NCU01810T0"	Set1_DD	Set1_LP	OK	26.7136	65.8057	1.30064	3.40035	5e-05	0.00128834	yes
1305	MSTRG.2552	"NCU00678T0"	Set1_DD	Set1_LP	OK	6.37293	15.4689	1.27934	2.57271	0.0006	0.0101835	yes
2880	MSTRG.7727	"NCU08674T0"	Set1_DD	Set1_LP	OK	18.0959	43.704	1.2721	3.17612	5e-05	0.00128834	yes
2835	MSTRG.7564	"NCU04343T0"	Set1_DD	Set1_LP	OK	207.488	500.63	1.27072	2.70425	0.0002	0.00420033	yes
600	MSTRG.11819	"NCU05049T0"	Set1_DD	Set1_LP	OK	2.62591	6.32838	1.26902	2.52153	0.00095	0.0145566	yes
1485	MSTRG.3177	"NCU02765T0"	Set1_DD	Set1_LP	OK	156.816	376.02	1.26173	3.12858	5e-05	0.00128834	yes
3450	MSTRG.9318	"NCU01154T1"	Set1_DD	Set1_LP	OK	12.3434	29.3228	1.24829	3.00825	5e-05	0.00128834	yes
3300	MSTRG.8918	"NCU03684T1"	Set1_DD	Set1_LP	OK	78.7279	186.607	1.24506	2.78736	0.0002	0.00420033	yes
900	MSTRG.12770	"NCU02307T0"	Set1_DD	Set1_LP	OK	29.894	70.7914	1.24372	3.19273	5e-05	0.00128834	yes
75	MSTRG.10207	"NCU04274T0"	Set1_DD	Set1_LP	OK	69.4116	160.441	1.2088	3.11135	5e-05	0.00128834	yes
2370	MSTRG.6471	"NCU07584T0"	Set1_DD	Set1_LP	OK	15.4431	35.6793	1.20813	2.92177	5e-05	0.00128834	yes
2700	MSTRG.7138	"NCU08290T0"	Set1_DD	Set1_LP	OK	11.8931	27.4111	1.20464	2.91167	5e-05	0.00128834	yes
840	MSTRG.12654	"NCU02397T0"	Set1_DD	Set1_LP	OK	52.2292	118.746	1.18495	2.99592	5e-05	0.00128834	yes
3435	MSTRG.9309	"MSTRG.9309.1"	Set1_DD	Set1_LP	OK	3.70576	8.40209	1.18098	2.44966	0.00085	0.013367	yes
3045	MSTRG.7994	"NCU07024T0"	Set1_DD	Set1_LP	OK	83.9207	189.378	1.17417	2.95321	5e-05	0.00128834	yes
210	MSTRG.1064	"NCU02651T0"	Set1_DD	Set1_LP	OK	26.4795	59.68	1.17237	2.97395	5e-05	0.00128834	yes
3060	MSTRG.8049	"NCU10777T0"	Set1_DD	Set1_LP	OK	54.8263	123.334	1.16963	2.57808	0.00035	0.00660875	yes
3240	MSTRG.8774	"NCU11040T0"	Set1_DD	Set1_LP	OK	44.5049	99.8975	1.16648	3.02246	0.0001	0.00234369	yes
1230	MSTRG.2315	"NCU00859T0"	Set1_DD	Set1_LP	OK	19.3612	43.4199	1.16519	2.5104	0.00035	0.00660875	yes
1620	MSTRG.35	"NCU08057T0"	Set1_DD	Set1_LP	OK	15.1292	33.6475	1.15316	2.60814	0.00045	0.00807047	yes
660	MSTRG.12009	"NCU09031T0"	Set1_DD	Set1_LP	OK	6.15963	13.5664	1.13912	2.5869	0.0001	0.00234369	yes
1470	MSTRG.3125	"NCU02800T0"	Set1_DD	Set1_LP	OK	36.9465	81.2611	1.13713	2.93367	5e-05	0.00128834	yes
2490	MSTRG.6695	"NCU07962T0"	Set1_DD	Set1_LP	OK	210.545	462.999	1.13688	2.70899	0.00015	0.00331184	yes
3375	MSTRG.9269	"NCU01107T0"	Set1_DD	Set1_LP	OK	173.538	379.647	1.12941	2.68691	0.0003	0.00584877	yes
1020	MSTRG.13071	"NCU05770T0"	Set1_DD	Set1_LP	OK	56.8386	123.658	1.12142	2.7066	5e-05	0.00128834	yes
2505	MSTRG.670	"NCU01924T1"	Set1_DD	Set1_LP	OK	46.3258	100.443	1.11649	2.83166	5e-05	0.00128834	yes
1545	MSTRG.3428	"MSTRG.3428.3"	Set1_DD	Set1_LP	OK	4.49729	9.74382	1.11543	2.46951	0.0008	0.012757	yes
1080	MSTRG.1406	"NCU03071T0"	Set1_DD	Set1_LP	OK	27.7652	59.9704	1.11097	2.85628	0.0001	0.00234369	yes
15	MSTRG.10024	"NCU04144T0"	Set1_DD	Set1_LP	OK	13.6789	29.4653	1.10707	2.73918	0.00035	0.00660875	yes
2160	MSTRG.5919	"NCU00401T1"	Set1_DD	Set1_LP	OK	19.7064	42.1771	1.09779	2.7596	0.00015	0.00331184	yes
1050	MSTRG.13207	"NCU11307T0"	Set1_DD	Set1_LP	OK	17.5609	37.5618	1.0969	2.59539	0.00045	0.00807047	yes
1800	MSTRG.4523	"NCU08727T1"	Set1_DD	Set1_LP	OK	27.6791	59.1646	1.09594	2.39743	0.00095	0.0145566	yes
2100	MSTRG.579	"NCU01989T0"	Set1_DD	Set1_LP	OK	13.1479	27.7249	1.07635	2.46958	0.00075	0.0121238	yes
1695	MSTRG.3948	"NCU11426T0"	Set1_DD	Set1_LP	OK	36.3051	76.4011	1.07342	2.78148	0.00015	0.00331184	yes
2850	MSTRG.7567	"NCU04342T0"	Set1_DD	Set1_LP	OK	105.311	221.538	1.0729	2.60689	0.0001	0.00234369	yes
615	MSTRG.11869	"NCU05013T0"	Set1_DD	Set1_LP	OK	4.21946	8.87205	1.07221	2.46313	0.0005	0.00879069	yes
105	MSTRG.1031	"NCU02629T0"	Set1_DD	Set1_LP	OK	229.261	479.579	1.06478	2.4901	0.00075	0.0121238	yes
195	MSTRG.10596	"NCU07075T0"	Set1_DD	Set1_LP	OK	16.1857	33.8381	1.06393	2.68025	0.0001	0.00234369	yes
765	MSTRG.12173	"NCU06940T0"	Set1_DD	Set1_LP	OK	224.118	467.774	1.06155	2.50117	0.0003	0.00584877	yes
165	MSTRG.10414	"NCU07234T0"	Set1_DD	Set1_LP	OK	27.5236	57.4041	1.06049	2.65907	0.0001	0.00234369	yes
555	MSTRG.11698	"NCU05148T0"	Set1_DD	Set1_LP	OK	29.003	60.1284	1.05184	2.32891	0.001	0.0151522	yes
2940	MSTRG.7796	"NCU07318T0"	Set1_DD	Set1_LP	OK	177.378	366.929	1.04868	2.42344	0.0007	0.0115127	yes
120	MSTRG.10323	"NCU08948T1"	Set1_DD	Set1_LP	OK	22.3757	46.0446	1.0411	2.67988	0.0001	0.00234369	yes
3225	MSTRG.8558	"NCU09692T0"	Set1_DD	Set1_LP	OK	10.776	22.1134	1.0371	2.46062	0.0007	0.0115127	yes
2805	MSTRG.7502	"NCU04390T1"	Set1_DD	Set1_LP	OK	22.9177	46.9174	1.03366	2.63357	0.0004	0.007345	yes
1275	MSTRG.2457	"NCU00743T0"	Set1_DD	Set1_LP	OK	101.902	208.486	1.03277	2.43069	0.00045	0.00807047	yes
2430	MSTRG.6598	"NCU16742T0"	Set1_DD	Set1_LP	OK	32.5209	66.1257	1.02384	2.50739	0.0003	0.00584877	yes
2565	MSTRG.681	"NCU01922T0"	Set1_DD	Set1_LP	OK	30.3633	61.1419	1.00983	2.43225	0.00035	0.00660875	yes
2520	MSTRG.6718	"NCU07945T0"	Set1_DD	Set1_LP	OK	10.6322	21.1593	0.992848	2.2827	0.00105	0.0157475	yes
2460	MSTRG.6606	"NCU04914T0"	Set1_DD	Set1_LP	OK	16.6133	32.6232	0.973559	2.3247	0.00085	0.013367	yes
3165	MSTRG.8458	"NCU07745T0"	Set1_DD	Set1_LP	OK	53.4494	104.575	0.968287	2.42631	0.0005	0.00879069	yes
2175	MSTRG.5972	"NCU00430T0"	Set1_DD	Set1_LP	OK	53.8823	104.362	0.953714	2.41132	0.0006	0.0101835	yes
405	MSTRG.1123	"NCU02690T0"	Set1_DD	Set1_LP	OK	11.3165	21.9136	0.953402	2.28129	0.001	0.0151522	yes
1185	MSTRG.1971	"NCU07425T1"	Set1_DD	Set1_LP	OK	28.236	54.4939	0.948559	2.43501	0.00055	0.00950481	yes
855	MSTRG.12669	"NCU02378T0"	Set1_DD	Set1_LP	OK	28.2097	53.5677	0.925172	2.40694	0.0006	0.0101835	yes
2340	MSTRG.6354	"NCU08791T0"	Set1_DD	Set1_LP	OK	79.0521	149.924	0.923355	2.31126	0.0009	0.0139539	yes
2670	MSTRG.6994	"NCU07728T0"	Set1_DD	Set1_LP	OK	22.1087	41.5002	0.908505	2.34631	0.00085	0.013367	yes
450	MSTRG.11325	"NCU03950T0"	Set1_DD	Set1_LP	OK	49.2228	26.0569	-0.917661	-2.32054	0.001	0.0151522	yes
1200	MSTRG.2018	"NCU07389T0"	Set1_DD	Set1_LP	OK	43.7893	23.0323	-0.926916	-2.37826	0.00075	0.0121238	yes
825	MSTRG.12545	"NCU06043T0"	Set1_DD	Set1_LP	OK	63.621	33.4626	-0.926955	-2.39478	0.00055	0.00950481	yes
1950	MSTRG.5105	"NCU06459T0"	Set1_DD	Set1_LP	OK	23.9298	12.5581	-0.93019	-2.34145	0.0009	0.0139539	yes
1560	MSTRG.3446	"NCU03509T0"	Set1_DD	Set1_LP	OK	217.85	114.072	-0.933399	-2.32351	0.00075	0.0121238	yes
1725	MSTRG.4053	"NCU01789T1"	Set1_DD	Set1_LP	OK	10.6636	5.50244	-0.954554	-2.29034	0.0011	0.016344	yes
1740	MSTRG.4111	"NCU01747T0"	Set1_DD	Set1_LP	OK	24.7972	12.7494	-0.959751	-2.33423	0.00085	0.013367	yes
1755	MSTRG.4157	"NCU01689T1"	Set1_DD	Set1_LP	OK	94.094	48.1194	-0.967485	-2.47989	0.00065	0.01087	yes
2145	MSTRG.5897	"NCU00382T0"	Set1_DD	Set1_LP	OK	19.5196	9.97327	-0.968783	-2.40351	0.0006	0.0101835	yes
3090	MSTRG.8106	"NCU09915T0"	Set1_DD	Set1_LP	OK	23.543	11.9757	-0.975191	-2.34298	0.0011	0.016344	yes
3285	MSTRG.8886	"NCU03651T1"	Set1_DD	Set1_LP	OK	89.5582	45.4485	-0.978593	-2.4901	0.00055	0.00950481	yes
585	MSTRG.11764	"NCU05079T0"	Set1_DD	Set1_LP	OK	73.4147	36.8601	-0.994008	-2.57803	0.00025	0.00504322	yes
285	MSTRG.1099	"NCU02671T0"	Set1_DD	Set1_LP	OK	82.8126	41.517	-0.99615	-2.46534	0.00065	0.01087	yes
1965	MSTRG.5214	"NCU06196T0"	Set1_DD	Set1_LP	OK	27.7034	13.795	-1.00592	-2.44555	0.00085	0.013367	yes
1290	MSTRG.2504	"NCU00712T0"	Set1_DD	Set1_LP	OK	52.2103	25.7438	-1.02011	-2.57292	0.00035	0.00660875	yes
255	MSTRG.10948	"NCU09798T0"	Set1_DD	Set1_LP	OK	26.6727	13.1336	-1.0221	-2.42672	0.0009	0.0139539	yes
1650	MSTRG.3842	"NCU06836T0"	Set1_DD	Set1_LP	OK	143.806	70.184	-1.03491	-2.60694	0.00025	0.00504322	yes
2970	MSTRG.7852	"NCU07282T0"	Set1_DD	Set1_LP	OK	41.8139	20.3642	-1.03795	-2.48682	0.0005	0.00879069	yes
1995	MSTRG.5304	"NCU06251T2"	Set1_DD	Set1_LP	OK	54.7636	26.176	-1.06498	-2.68114	0.00015	0.00331184	yes
3495	MSTRG.9611	"NCU01386T0"	Set1_DD	Set1_LP	OK	32.6059	15.5366	-1.06946	-2.66124	0.00025	0.00504322	yes
2010	MSTRG.5389	"NCU00040T0"	Set1_DD	Set1_LP	OK	70.4213	33.4761	-1.07288	-2.53064	0.00025	0.00504322	yes
2775	MSTRG.7400	"NCU04472T1"	Set1_DD	Set1_LP	OK	27.5313	12.866	-1.09751	-2.83182	5e-05	0.00128834	yes
1575	MSTRG.3466	"NCU03498T0"	Set1_DD	Set1_LP	OK	17.6064	8.16635	-1.10834	-2.52504	0.0003	0.00584877	yes
2745	MSTRG.7269	"NCU06327T0"	Set1_DD	Set1_LP	OK	63.9552	29.5622	-1.11331	-2.90408	0.0001	0.00234369	yes
1605	MSTRG.3478	"NCU03488T0"	Set1_DD	Set1_LP	OK	82.6508	38.1737	-1.11445	-2.88438	5e-05	0.00128834	yes
1410	MSTRG.295	"NCU02175T0"	Set1_DD	Set1_LP	OK	23.8547	10.9586	-1.12221	-2.80892	0.0002	0.00420033	yes
2715	MSTRG.7146	"NCU08288T0"	Set1_DD	Set1_LP	OK	50.8947	22.8948	-1.1525	-2.93456	0.0001	0.00234369	yes
1830	MSTRG.4670	"NCU09773T0"	Set1_DD	Set1_LP	OK	11.6627	5.23668	-1.15518	-2.47347	0.00075	0.0121238	yes
990	MSTRG.12965	"NCU08137T0"	Set1_DD	Set1_LP	OK	105.418	46.2931	-1.18725	-2.88721	0.0002	0.00420033	yes
510	MSTRG.11501	"NCU04088T0"	Set1_DD	Set1_LP	OK	20.1752	8.76882	-1.20213	-2.97738	5e-05	0.00128834	yes
1425	MSTRG.2973	"NCU02915T0"	Set1_DD	Set1_LP	OK	12.5648	5.45704	-1.2032	-2.67358	0.00015	0.00331184	yes
1845	MSTRG.4777	"NCU09497T0"	Set1_DD	Set1_LP	OK	56.0844	24.218	-1.21152	-2.94653	5e-05	0.00128834	yes
1635	MSTRG.3556	"NCU03426T0"	Set1_DD	Set1_LP	OK	11.1742	4.80131	-1.21868	-2.8197	5e-05	0.00128834	yes
315	MSTRG.11041	"NCU05577T0"	Set1_DD	Set1_LP	OK	34.4386	14.7709	-1.22127	-2.46172	0.00085	0.013367	yes
3030	MSTRG.7961	"NCU07002T0"	Set1_DD	Set1_LP	OK	11.0897	4.70584	-1.23669	-2.95121	0.0001	0.00234369	yes
2115	MSTRG.5798	"NCU00306T0"	Set1_DD	Set1_LP	OK	10.6237	4.46066	-1.25196	-2.69993	0.00015	0.00331184	yes
675	MSTRG.12040	"NCU09048T0"	Set1_DD	Set1_LP	OK	30.4855	12.7582	-1.25669	-3.16548	5e-05	0.00128834	yes
2640	MSTRG.6876	"NCU06579T0"	Set1_DD	Set1_LP	OK	6.60183	2.72979	-1.27408	-2.83466	0.0001	0.00234369	yes
1395	MSTRG.284	"NCU02184T1"	Set1_DD	Set1_LP	OK	11.3982	4.51156	-1.33711	-3.12741	5e-05	0.00128834	yes
3480	MSTRG.9575	"NCU11138T0"	Set1_DD	Set1_LP	OK	5.07852	1.97528	-1.36235	-2.9027	0.0001	0.00234369	yes
2985	MSTRG.7859	"NCU07277T0"	Set1_DD	Set1_LP	OK	117.104	44.5643	-1.39382	-3.23525	5e-05	0.00128834	yes
1590	MSTRG.3467	"NCU03497T0"	Set1_DD	Set1_LP	OK	51.8606	19.5966	-1.40403	-3.48548	5e-05	0.00128834	yes
2730	MSTRG.7267	"NCU06328T0"	Set1_DD	Set1_LP	OK	4.31304	1.58564	-1.44364	-2.57116	0.0011	0.016344	yes
1260	MSTRG.2362	"NCU00821T0"	Set1_DD	Set1_LP	OK	34.3635	12.3821	-1.47262	-3.61699	5e-05	0.00128834	yes
2895	MSTRG.7772	"NCU07334T0"	Set1_DD	Set1_LP	OK	54.3686	19.0872	-1.51017	-3.75147	5e-05	0.00128834	yes
2205	MSTRG.6111	"NCU10429T0"	Set1_DD	Set1_LP	OK	3.87777	1.12647	-1.78341	-2.3815	0.00045	0.00807047	yes
3180	MSTRG.8479	"NCU07736T0"	Set1_DD	Set1_LP	OK	30.5701	8.77715	-1.8003	-4.3285	5e-05	0.00128834	yes
2250	MSTRG.6253	"NCU08226T0"	Set1_DD	Set1_LP	OK	12.5109	3.55336	-1.81593	-3.87446	5e-05	0.00128834	yes
2190	MSTRG.6110	"NCU09010T0"	Set1_DD	Set1_LP	OK	143.747	40.1119	-1.84143	-4.59169	5e-05	0.00128834	yes
780	MSTRG.12224	"NCU08397T0"	Set1_DD	Set1_LP	OK	152.177	40.6915	-1.90295	-4.80673	5e-05	0.00128834	yes
2265	MSTRG.6255	"NCU08228T0"	Set1_DD	Set1_LP	OK	28.6682	6.00217	-2.25589	-3.3612	0.0002	0.00420033	yes

## Sheet: dim5
	gene_id	NCU	sample_1	sample_2	status	value_1(FPKM)	value_2(FPKM)	log2_fold_change	test_stat	p_value	q_value	significant
1716	MSTRG.2720	"NCU00552T0"	dim5_DD	dim5_LP	OK	3.92551	1759.03	8.80769	15.3976	5e-05	0.00128834	yes
2211	MSTRG.4496	"NCU08699T0"	dim5_DD	dim5_LP	OK	1.94941	593.46	8.24997	12.8977	5e-05	0.00128834	yes
1701	MSTRG.2680	"NCU00582T0"	dim5_DD	dim5_LP	OK	3.28367	651.429	7.63215	15.3891	5e-05	0.00128834	yes
2826	MSTRG.6392	"NCU08769T0"	dim5_DD	dim5_LP	OK	9.98569	1179.05	6.88355	9.65494	5e-05	0.00128834	yes
1131	MSTRG.12939	"NCU02190T0"	dim5_DD	dim5_LP	OK	2.04536	192.063	6.55308	11.8766	5e-05	0.00128834	yes
3471	MSTRG.7786	"NCU07325T0"	dim5_DD	dim5_LP	OK	26.3895	2410.75	6.51338	13.8798	5e-05	0.00128834	yes
1476	MSTRG.192	"NCU07434T0"	dim5_DD	dim5_LP	OK	1.61071	135.003	6.38915	11.2436	5e-05	0.00128834	yes
3726	MSTRG.8488	"NCU09830T0"	dim5_DD	dim5_LP	OK	1.34323	76.4731	5.83118	11.9154	5e-05	0.00128834	yes
141	MSTRG.10357	"NCU10063T0"	dim5_DD	dim5_LP	OK	2.97663	161.97	5.7659	1.09605	0.00025	0.00504322	yes
486	MSTRG.11340	"NCU03967T0"	dim5_DD	dim5_LP	OK	17.2192	863.062	5.64738	12.2874	5e-05	0.00128834	yes
1866	MSTRG.3288	"NCU08626T0"	dim5_DD	dim5_LP	OK	6.95499	245.522	5.14166	11.4641	5e-05	0.00128834	yes
636	MSTRG.11704	"NCU05143T0"	dim5_DD	dim5_LP	OK	2.86427	90.4938	4.98158	10.4878	5e-05	0.00128834	yes
4011	MSTRG.9246	"NCU01089T1"	dim5_DD	dim5_LP	OK	7.22694	205.057	4.82649	11.2907	5e-05	0.00128834	yes
936	MSTRG.12318	"NCU12026T0"	dim5_DD	dim5_LP	OK	1.72133	45.9772	4.73932	8.82804	5e-05	0.00128834	yes
891	MSTRG.12136	"NCU06915T0"	dim5_DD	dim5_LP	OK	7.87166	189.823	4.59184	4.8848	5e-05	0.00128834	yes
3336	MSTRG.7425	"NCU04452T0"	dim5_DD	dim5_LP	OK	32.5884	718.304	4.46216	10.6296	5e-05	0.00128834	yes
2541	MSTRG.5705	"NCU00244T0"	dim5_DD	dim5_LP	OK	3.53306	77.3592	4.45258	9.07146	5e-05	0.00128834	yes
2796	MSTRG.6326	"NCU08533T0"	dim5_DD	dim5_LP	OK	0.642536	13.24	4.36499	2.8685	5e-05	0.00128834	yes
261	MSTRG.10717	"NCU04725T0"	dim5_DD	dim5_LP	OK	0.678438	12.9951	4.2596	5.70112	5e-05	0.00128834	yes
3306	MSTRG.7298	"NCU06306T0"	dim5_DD	dim5_LP	OK	8.75032	157.743	4.17209	9.63714	5e-05	0.00128834	yes
336	MSTRG.11021	"NCU05594T0"	dim5_DD	dim5_LP	OK	23.0505	404.851	4.13452	9.26637	5e-05	0.00128834	yes
3636	MSTRG.832	"MSTRG.832.1"	dim5_DD	dim5_LP	OK	2.18799	34.693	3.98697	7.16992	5e-05	0.00128834	yes
1656	MSTRG.2664	"NCU00585T0"	dim5_DD	dim5_LP	OK	127.399	1915.44	3.91025	7.02343	5e-05	0.00128834	yes
861	MSTRG.12045	"NCU11395T0"	dim5_DD	dim5_LP	OK	14.153	205.068	3.85692	9.28553	5e-05	0.00128834	yes
4236	MSTRG.9671	"NCU01427T0"	dim5_DD	dim5_LP	OK	16.5558	228.42	3.78628	6.12464	5e-05	0.00128834	yes
2721	MSTRG.6298	"NCU08557T0"	dim5_DD	dim5_LP	OK	2.33072	32.0084	3.7796	4.81923	0.00015	0.00331184	yes
2601	MSTRG.5866	"NCU00360T0"	dim5_DD	dim5_LP	OK	7.47288	100.689	3.7521	6.28726	5e-05	0.00128834	yes
3201	MSTRG.7136	"NCU08291T0"	dim5_DD	dim5_LP	OK	20.4506	270.692	3.72644	9.16137	5e-05	0.00128834	yes
711	MSTRG.11834	"NCU05040T0"	dim5_DD	dim5_LP	OK	5.23708	65.8108	3.65149	4.59957	5e-05	0.00128834	yes
3741	MSTRG.8489	"NCU09829T0"	dim5_DD	dim5_LP	OK	2.67134	31.3279	3.55181	7.54891	5e-05	0.00128834	yes
2331	MSTRG.5062	"NCU06420T0"	dim5_DD	dim5_LP	OK	31.4967	343.753	3.4481	8.3849	5e-05	0.00128834	yes
3981	MSTRG.9204	"NCU01060T0"	dim5_DD	dim5_LP	OK	29.9433	308.297	3.36402	8.02871	5e-05	0.00128834	yes
2511	MSTRG.5695	"NCU00236T0"	dim5_DD	dim5_LP	OK	8.17887	83.5678	3.35297	7.69901	5e-05	0.00128834	yes
3411	MSTRG.769	"NCU01861T0"	dim5_DD	dim5_LP	OK	34.831	346.739	3.3154	8.23316	5e-05	0.00128834	yes
3561	MSTRG.8050	"NCU08824T0"	dim5_DD	dim5_LP	OK	29.2621	288.7	3.30247	8.19017	5e-05	0.00128834	yes
726	MSTRG.11905	"NCU11424T0"	dim5_DD	dim5_LP	OK	32.9016	321.064	3.28663	7.65929	5e-05	0.00128834	yes
3666	MSTRG.8356	"NCU08850T0"	dim5_DD	dim5_LP	OK	5.02975	48.2541	3.26209	7.70476	5e-05	0.00128834	yes
1101	MSTRG.12826	"MSTRG.12826.3"	dim5_DD	dim5_LP	OK	3.05475	28.5506	3.2244	4.70546	5e-05	0.00128834	yes
2841	MSTRG.6472	"NCU07585T0"	dim5_DD	dim5_LP	OK	19.1372	178.309	3.21993	7.84817	5e-05	0.00128834	yes
1116	MSTRG.12827	"NCU02265T2"	dim5_DD	dim5_LP	OK	5.85887	52.7413	3.17024	5.81568	5e-05	0.00128834	yes
3531	MSTRG.7873	"NCU07267T0"	dim5_DD	dim5_LP	OK	125.917	1123.8	3.15784	7.30448	5e-05	0.00128834	yes
4266	MSTRG.9710	"NCU06655T0"	dim5_DD	dim5_LP	OK	7.59844	64.4677	3.0848	7.24907	5e-05	0.00128834	yes
3141	MSTRG.6851	"NCU06553T0"	dim5_DD	dim5_LP	OK	3.1574	24.7226	2.96902	3.49092	0.00075	0.0121238	yes
2676	MSTRG.6181	"NCU07541T0"	dim5_DD	dim5_LP	OK	8.57876	64.9169	2.91975	6.52827	5e-05	0.00128834	yes
291	MSTRG.10868	"NCU04823T1"	dim5_DD	dim5_LP	OK	5.02986	36.133	2.84473	5.98193	5e-05	0.00128834	yes
1311	MSTRG.1444	"NCU03098T0"	dim5_DD	dim5_LP	OK	1.67461	12.0115	2.84252	3.58149	0.00025	0.00504322	yes
1221	MSTRG.13173	"NCU05844T0"	dim5_DD	dim5_LP	OK	19.6055	139.102	2.82681	6.51112	5e-05	0.00128834	yes
1206	MSTRG.13144	"NCU05819T0"	dim5_DD	dim5_LP	OK	0.830383	5.85654	2.8182	4.14776	0.0001	0.00234369	yes
3051	MSTRG.6751	"NCU07923T0"	dim5_DD	dim5_LP	OK	2.49133	17.1615	2.78419	4.97	5e-05	0.00128834	yes
471	MSTRG.1127	"NCU02691T1"	dim5_DD	dim5_LP	OK	10.2639	70.0194	2.77018	6.46377	5e-05	0.00128834	yes
1776	MSTRG.3123	"NCU02801T0"	dim5_DD	dim5_LP	OK	20.4505	138.63	2.76103	5.97979	5e-05	0.00128834	yes
831	MSTRG.12041	"NCU09049T0"	dim5_DD	dim5_LP	OK	34.5398	226.583	2.71371	6.78619	5e-05	0.00128834	yes
2376	MSTRG.5270	"NCU06231T0"	dim5_DD	dim5_LP	OK	14.2118	93.0958	2.71162	6.77224	5e-05	0.00128834	yes
1431	MSTRG.1808	"NCU09141T0"	dim5_DD	dim5_LP	OK	26.5174	173.219	2.70759	6.60485	5e-05	0.00128834	yes
1821	MSTRG.3233	"NCU09235T0"	dim5_DD	dim5_LP	OK	33.7335	215.625	2.67627	6.77069	5e-05	0.00128834	yes
4101	MSTRG.9307	"MSTRG.9307.2"	dim5_DD	dim5_LP	OK	0.576681	3.66121	2.66648	3.28491	0.0009	0.0139539	yes
2436	MSTRG.5495	"MSTRG.5495.1"	dim5_DD	dim5_LP	OK	0.786747	4.94548	2.65214	3.3239	5e-05	0.00128834	yes
1176	MSTRG.13023	"NCU08173T0"	dim5_DD	dim5_LP	OK	5.56658	34.1698	2.61786	5.49098	5e-05	0.00128834	yes
3171	MSTRG.6906	"NCU06597T0"	dim5_DD	dim5_LP	OK	64.7884	389.776	2.58884	6.47762	5e-05	0.00128834	yes
3516	MSTRG.7866	"NCU07264T0"	dim5_DD	dim5_LP	OK	20.7748	122.594	2.56098	4.97284	5e-05	0.00128834	yes
651	MSTRG.11705	"NCU05142T0"	dim5_DD	dim5_LP	OK	0.897876	5.17251	2.52628	3.34676	0.00035	0.00660875	yes
3486	MSTRG.7790	"NCU07323T0"	dim5_DD	dim5_LP	OK	3.48581	19.7563	2.50275	5.00755	5e-05	0.00128834	yes
4071	MSTRG.9283	"NCU01124T0"	dim5_DD	dim5_LP	OK	14.5786	82.3771	2.49839	6.03907	5e-05	0.00128834	yes
501	MSTRG.11350	"NCU17113T0"	dim5_DD	dim5_LP	OK	12.3064	69.4818	2.49723	3.91586	5e-05	0.00128834	yes
846	MSTRG.12043	"MSTRG.12043.1"	dim5_DD	dim5_LP	OK	3.48291	19.3264	2.47221	5.21104	5e-05	0.00128834	yes
3681	MSTRG.8391	"NCU07794T0"	dim5_DD	dim5_LP	OK	9.04709	50.0941	2.46911	4.99125	5e-05	0.00128834	yes
366	MSTRG.11065	"MSTRG.11065.2"	dim5_DD	dim5_LP	OK	1.08253	5.97215	2.46384	3.74102	5e-05	0.00128834	yes
2691	MSTRG.6182	"MSTRG.6182.1"	dim5_DD	dim5_LP	OK	1.23277	6.6689	2.43555	3.71299	5e-05	0.00128834	yes
3951	MSTRG.9140	"NCU00999T0"	dim5_DD	dim5_LP	OK	42.6806	224.168	2.39293	5.82959	5e-05	0.00128834	yes
4086	MSTRG.9285	"NCU01127T0"	dim5_DD	dim5_LP	OK	18.447	95.0184	2.36482	5.73633	5e-05	0.00128834	yes
951	MSTRG.12358	"NCU04539T0"	dim5_DD	dim5_LP	OK	1.5983	8.15248	2.3507	3.7584	5e-05	0.00128834	yes
3186	MSTRG.7090	"NCU07661T0"	dim5_DD	dim5_LP	OK	7.98657	40.0364	2.32566	3.42734	0.0001	0.00234369	yes
3381	MSTRG.7537	"NCU04368T0"	dim5_DD	dim5_LP	OK	30.4834	149.548	2.29451	5.80985	5e-05	0.00128834	yes
321	MSTRG.10954	"NCU05652T0"	dim5_DD	dim5_LP	OK	21.7907	105.972	2.2819	5.21502	5e-05	0.00128834	yes
2556	MSTRG.5752	"NCU00276T0"	dim5_DD	dim5_LP	OK	3.91725	18.97	2.27581	5.4404	5e-05	0.00128834	yes
1671	MSTRG.2666	"NCU00584T0"	dim5_DD	dim5_LP	OK	43.2792	209.252	2.2735	5.57936	5e-05	0.00128834	yes
876	MSTRG.12058	"NCU09057T0"	dim5_DD	dim5_LP	OK	61.9033	291.759	2.23669	5.21396	5e-05	0.00128834	yes
2481	MSTRG.5643	"NCU00203T0"	dim5_DD	dim5_LP	OK	22.5559	105.769	2.22933	5.19672	5e-05	0.00128834	yes
1491	MSTRG.2083	"NCU07345T0"	dim5_DD	dim5_LP	OK	8.52405	39.703	2.21964	4.34266	5e-05	0.00128834	yes
3501	MSTRG.7799	"NCU07314T1"	dim5_DD	dim5_LP	OK	6.40531	29.4998	2.20336	5.30069	5e-05	0.00128834	yes
4281	MSTRG.972	"NCU02596T0"	dim5_DD	dim5_LP	OK	51.4026	236.412	2.20139	5.60119	5e-05	0.00128834	yes
2466	MSTRG.560	"NCU01997T0"	dim5_DD	dim5_LP	OK	13.698	62.2625	2.1844	5.50692	5e-05	0.00128834	yes
1506	MSTRG.2177	"NCU00939T0"	dim5_DD	dim5_LP	OK	23.537	105.083	2.15852	5.40811	5e-05	0.00128834	yes
21	MSTRG.10192	"NCU04266T0"	dim5_DD	dim5_LP	OK	118.652	524.655	2.14463	5.48615	5e-05	0.00128834	yes
1551	MSTRG.2330	"NCU00838T0"	dim5_DD	dim5_LP	OK	23.1044	101.041	2.1287	5.31548	5e-05	0.00128834	yes
1086	MSTRG.12804	"MSTRG.12804.1"	dim5_DD	dim5_LP	OK	0.971244	4.16501	2.10041	2.90934	0.0003	0.00584877	yes
2751	MSTRG.6311	"NCU16710T0"	dim5_DD	dim5_LP	OK	7.66436	32.6175	2.08941	4.12624	5e-05	0.00128834	yes
2076	MSTRG.3925	"NCU06751T0"	dim5_DD	dim5_LP	OK	10.0978	42.0371	2.05763	2.90763	0.0009	0.0139539	yes
1416	MSTRG.1771	"NCU10852T1"	dim5_DD	dim5_LP	OK	27.6026	114.873	2.05716	5.0621	5e-05	0.00128834	yes
3651	MSTRG.8331	"NCU10291T0"	dim5_DD	dim5_LP	OK	2.36678	9.66097	2.02924	4.33395	5e-05	0.00128834	yes
3921	MSTRG.8880	"NCU03647T0"	dim5_DD	dim5_LP	OK	7.71576	31.3675	2.02339	5.07728	5e-05	0.00128834	yes
1596	MSTRG.2427	"NCU00761T1"	dim5_DD	dim5_LP	OK	1.02216	4.12796	2.01381	3.72772	5e-05	0.00128834	yes
561	MSTRG.1156	"NCU02713T0"	dim5_DD	dim5_LP	OK	36.2463	144.322	1.99339	5.0835	5e-05	0.00128834	yes
51	MSTRG.1027	"NCU02636T0"	dim5_DD	dim5_LP	OK	16.4273	65.3496	1.99208	4.91515	5e-05	0.00128834	yes
966	MSTRG.12428	"NCU06125T0"	dim5_DD	dim5_LP	OK	52.8472	209.958	1.9902	4.95003	5e-05	0.00128834	yes
1041	MSTRG.12749	"NCU02322T0"	dim5_DD	dim5_LP	OK	4.21906	16.2741	1.94758	3.78452	5e-05	0.00128834	yes
1686	MSTRG.2678	"NCU00586T0"	dim5_DD	dim5_LP	OK	28.7709	109.491	1.92813	4.93361	5e-05	0.00128834	yes
411	MSTRG.11170	"NCU10011T0"	dim5_DD	dim5_LP	OK	34.8945	132.171	1.92133	4.89662	5e-05	0.00128834	yes
2286	MSTRG.4962	"NCU07837T0"	dim5_DD	dim5_LP	OK	17.2814	64.1341	1.89188	4.74081	5e-05	0.00128834	yes
156	MSTRG.10373	"NCU09846T0"	dim5_DD	dim5_LP	OK	6.48872	24.0449	1.88973	4.73858	5e-05	0.00128834	yes
4131	MSTRG.9359	"NCU01188T0"	dim5_DD	dim5_LP	OK	19.4168	70.1856	1.85387	4.65631	5e-05	0.00128834	yes
1356	MSTRG.1518	"NCU03151T0"	dim5_DD	dim5_LP	OK	320.602	1154.49	1.8484	2.63776	0.00075	0.0121238	yes
441	MSTRG.112	"NCU07498T0"	dim5_DD	dim5_LP	OK	10.6315	37.871	1.83276	4.68575	5e-05	0.00128834	yes
1791	MSTRG.3170	"NCU02771T0"	dim5_DD	dim5_LP	OK	21.8815	77.1075	1.81716	2.64017	0.0007	0.0115127	yes
1626	MSTRG.2506	"NCU00711T0"	dim5_DD	dim5_LP	OK	4.56573	16.0847	1.81678	4.07998	5e-05	0.00128834	yes
1251	MSTRG.1336	"NCU09820T0"	dim5_DD	dim5_LP	OK	73.8029	257.822	1.80462	4.02397	5e-05	0.00128834	yes
4116	MSTRG.9318	"NCU01154T1"	dim5_DD	dim5_LP	OK	8.33839	28.9152	1.79399	4.34654	5e-05	0.00128834	yes
81	MSTRG.1031	"NCU02629T0"	dim5_DD	dim5_LP	OK	91.5733	317.521	1.79385	4.44897	5e-05	0.00128834	yes
546	MSTRG.11524	"NCU06010T0"	dim5_DD	dim5_LP	OK	0.966288	3.33299	1.78629	2.88777	0.00065	0.01087	yes
2856	MSTRG.6508	"NCU07617T0"	dim5_DD	dim5_LP	OK	4.40954	15.2043	1.78577	4.103	5e-05	0.00128834	yes
2046	MSTRG.3865	"NCU06803T0"	dim5_DD	dim5_LP	OK	13.1952	45.115	1.7736	4.13219	5e-05	0.00128834	yes
3156	MSTRG.6855	"NCU06554T0"	dim5_DD	dim5_LP	OK	27.146	92.272	1.76515	4.45546	5e-05	0.00128834	yes
696	MSTRG.11819	"NCU05049T0"	dim5_DD	dim5_LP	OK	1.27608	4.3265	1.76148	3.00683	0.0001	0.00234369	yes
4326	MSTRG.9830	"NCU09535T0"	dim5_DD	dim5_LP	OK	17.4039	58.6135	1.75183	2.93281	0.00015	0.00331184	yes
2091	MSTRG.3948	"NCU11426T0"	dim5_DD	dim5_LP	OK	20.3848	68.0594	1.7393	4.49116	5e-05	0.00128834	yes
456	MSTRG.1123	"NCU02690T0"	dim5_DD	dim5_LP	OK	11.5163	38.4132	1.73793	4.2097	5e-05	0.00128834	yes
4056	MSTRG.9273	"NCU01112T0"	dim5_DD	dim5_LP	OK	11.9672	39.446	1.7208	3.76414	5e-05	0.00128834	yes
2256	MSTRG.4902	"NCU05721T0"	dim5_DD	dim5_LP	OK	13.6936	44.4663	1.69921	4.36553	5e-05	0.00128834	yes
2916	MSTRG.6600	"NCU04908T0"	dim5_DD	dim5_LP	OK	24.1796	78.2776	1.69481	3.07997	0.0002	0.00420033	yes
1461	MSTRG.1919	"NCU09210T0"	dim5_DD	dim5_LP	OK	94.8662	306.933	1.69396	4.25897	5e-05	0.00128834	yes
3126	MSTRG.6842	"NCU06549T0"	dim5_DD	dim5_LP	OK	49.021	157.756	1.68622	4.2541	5e-05	0.00128834	yes
4341	MSTRG.987	"MSTRG.987.2"	dim5_DD	dim5_LP	OK	3.6268	11.5761	1.67438	2.74225	0.0011	0.016344	yes
1026	MSTRG.12706	"NCU02356T0"	dim5_DD	dim5_LP	OK	28.6453	91.2739	1.6719	4.14485	5e-05	0.00128834	yes
3366	MSTRG.7502	"NCU04390T1"	dim5_DD	dim5_LP	OK	18.0945	57.4582	1.66696	4.22114	5e-05	0.00128834	yes
3426	MSTRG.7727	"NCU08674T0"	dim5_DD	dim5_LP	OK	12.3478	39.111	1.66332	4.20793	5e-05	0.00128834	yes
516	MSTRG.11410	"NCU04021T0"	dim5_DD	dim5_LP	OK	12.5413	39.5746	1.65789	4.24272	5e-05	0.00128834	yes
3831	MSTRG.8656	"NCU04639T0"	dim5_DD	dim5_LP	OK	273.412	858.762	1.65118	3.84383	5e-05	0.00128834	yes
4221	MSTRG.9663	"NCU01422T0"	dim5_DD	dim5_LP	OK	166.198	516.069	1.63466	3.95218	5e-05	0.00128834	yes
3111	MSTRG.682	"NCU11201T0"	dim5_DD	dim5_LP	OK	10.4524	32.394	1.63189	3.61009	5e-05	0.00128834	yes
111	MSTRG.10351	"NCU09841T0"	dim5_DD	dim5_LP	OK	17.132	52.9416	1.6277	3.55628	5e-05	0.00128834	yes
2736	MSTRG.6309	"NCU08549T0"	dim5_DD	dim5_LP	OK	40.6688	124.823	1.61789	4.16009	5e-05	0.00128834	yes
2121	MSTRG.4016	"NCU01810T0"	dim5_DD	dim5_LP	OK	21.4857	65.831	1.61539	4.14433	5e-05	0.00128834	yes
981	MSTRG.12469	"NCU06095T1"	dim5_DD	dim5_LP	OK	37.6941	115.354	1.61366	4.09034	5e-05	0.00128834	yes
2871	MSTRG.6522	"NCU07626T0"	dim5_DD	dim5_LP	OK	7.60737	23.1751	1.60711	3.12482	5e-05	0.00128834	yes
1266	MSTRG.1354	"NCU09319T1"	dim5_DD	dim5_LP	OK	17.7033	53.2378	1.58843	2.51915	0.00085	0.013367	yes
1896	MSTRG.3329	"NCU09615T0"	dim5_DD	dim5_LP	OK	9.93967	29.7112	1.57974	3.51194	5e-05	0.00128834	yes
576	MSTRG.11609	"MSTRG.11609.1"	dim5_DD	dim5_LP	OK	8.0645	23.9521	1.5705	3.66349	5e-05	0.00128834	yes
4311	MSTRG.9829	"NCU09534T0"	dim5_DD	dim5_LP	OK	51.565	152.987	1.56894	3.52467	5e-05	0.00128834	yes
2316	MSTRG.5042	"NCU06407T0"	dim5_DD	dim5_LP	OK	19.0002	55.4912	1.54624	3.9576	5e-05	0.00128834	yes
3021	MSTRG.6695	"NCU07962T0"	dim5_DD	dim5_LP	OK	192.802	562.109	1.54373	3.55986	5e-05	0.00128834	yes
2811	MSTRG.6354	"NCU08791T0"	dim5_DD	dim5_LP	OK	75.7171	219.448	1.53519	3.73323	5e-05	0.00128834	yes
3816	MSTRG.8651	"NCU04641T0"	dim5_DD	dim5_LP	OK	31.2804	89.169	1.51128	3.90853	5e-05	0.00128834	yes
426	MSTRG.11171	"NCU10012T0"	dim5_DD	dim5_LP	OK	6.19295	17.0725	1.46297	3.18603	5e-05	0.00128834	yes
1341	MSTRG.1510	"NCU03152T0"	dim5_DD	dim5_LP	OK	62.9193	171.319	1.44511	3.62669	5e-05	0.00128834	yes
2016	MSTRG.3824	"NCU06847T0"	dim5_DD	dim5_LP	OK	12.912	35.0415	1.44035	3.65948	5e-05	0.00128834	yes
6	MSTRG.10084	"MSTRG.10084.1"	dim5_DD	dim5_LP	OK	24.6809	66.9334	1.43933	3.13613	5e-05	0.00128834	yes
201	MSTRG.10592	"NCU07082T0"	dim5_DD	dim5_LP	OK	19.8589	53.7182	1.43563	3.72252	5e-05	0.00128834	yes
1281	MSTRG.1406	"NCU03071T0"	dim5_DD	dim5_LP	OK	25.036	67.7153	1.43548	3.69358	5e-05	0.00128834	yes
921	MSTRG.12301	"NCU09715T0"	dim5_DD	dim5_LP	OK	63.414	171.327	1.43388	3.39008	5e-05	0.00128834	yes
4026	MSTRG.9269	"NCU01107T0"	dim5_DD	dim5_LP	OK	214.544	579.513	1.43356	3.4764	5e-05	0.00128834	yes
3351	MSTRG.7471	"NCU04416T0"	dim5_DD	dim5_LP	OK	6.97653	18.7942	1.4297	3.08304	5e-05	0.00128834	yes
1881	MSTRG.3317	"NCU09631T0"	dim5_DD	dim5_LP	OK	2.57718	6.88253	1.41715	2.64065	0.0006	0.0101835	yes
2631	MSTRG.594	"NCU01972T0"	dim5_DD	dim5_LP	OK	16.2511	43.2064	1.41071	2.3978	0.00125	0.018034	yes
3066	MSTRG.6755	"NCU07921T0"	dim5_DD	dim5_LP	OK	25.739	68.383	1.40968	3.21962	5e-05	0.00128834	yes
681	MSTRG.11794	"NCU05069T0"	dim5_DD	dim5_LP	OK	19.7548	52.1749	1.40115	2.43581	0.001	0.0151522	yes
1191	MSTRG.13071	"NCU05770T0"	dim5_DD	dim5_LP	OK	232.338	612.938	1.39951	3.17363	5e-05	0.00128834	yes
2781	MSTRG.6323	"MSTRG.6323.1"	dim5_DD	dim5_LP	OK	3.05275	8.04224	1.39749	2.68477	0.00015	0.00331184	yes
2136	MSTRG.4273	"NCU01581T0"	dim5_DD	dim5_LP	OK	5.25077	13.7598	1.38985	2.52083	0.001	0.0151522	yes
741	MSTRG.11979	"NCU09451T0"	dim5_DD	dim5_LP	OK	2.74005	7.15839	1.38543	2.64221	0.00075	0.0121238	yes
1371	MSTRG.1570	"NCU03188T0"	dim5_DD	dim5_LP	OK	56.3094	146.58	1.38025	3.24977	5e-05	0.00128834	yes
246	MSTRG.1064	"NCU02651T0"	dim5_DD	dim5_LP	OK	19.6454	50.6401	1.36609	3.45924	5e-05	0.00128834	yes
1536	MSTRG.2308	"NCU00865T0"	dim5_DD	dim5_LP	OK	47.6922	122.756	1.36397	2.62546	0.00015	0.00331184	yes
3456	MSTRG.7775	"NCU07332T0"	dim5_DD	dim5_LP	OK	21.0322	53.8765	1.35705	3.0968	0.0001	0.00234369	yes
2976	MSTRG.663	"NCU01929T0"	dim5_DD	dim5_LP	OK	30.1775	77.2538	1.35613	2.83923	5e-05	0.00128834	yes
216	MSTRG.10596	"NCU07075T0"	dim5_DD	dim5_LP	OK	15.0582	38.2202	1.34378	3.35032	5e-05	0.00128834	yes
4176	MSTRG.9561	"NCU01345T1"	dim5_DD	dim5_LP	OK	9.54223	24.1835	1.34163	3.335	5e-05	0.00128834	yes
186	MSTRG.10547	"NCU07119T0"	dim5_DD	dim5_LP	OK	3.74428	9.46176	1.33742	2.93165	0.00015	0.00331184	yes
621	MSTRG.11698	"NCU05148T0"	dim5_DD	dim5_LP	OK	62.529	157.509	1.33284	3.35805	5e-05	0.00128834	yes
2196	MSTRG.4493	"NCU08703T0"	dim5_DD	dim5_LP	OK	4.62594	11.5323	1.31786	2.58196	0.00065	0.01087	yes
996	MSTRG.12654	"NCU02397T0"	dim5_DD	dim5_LP	OK	56.4468	139.261	1.30283	3.34447	5e-05	0.00128834	yes
1746	MSTRG.3093	"NCU02819T2"	dim5_DD	dim5_LP	OK	20.036	49.4164	1.30239	3.26381	5e-05	0.00128834	yes
96	MSTRG.10323	"NCU08948T1"	dim5_DD	dim5_LP	OK	16.599	40.8813	1.30035	3.24912	5e-05	0.00128834	yes
2901	MSTRG.6598	"NCU16742T0"	dim5_DD	dim5_LP	OK	31.9584	78.6317	1.29892	3.23937	5e-05	0.00128834	yes
1296	MSTRG.1408	"NCU03072T0"	dim5_DD	dim5_LP	OK	9.60374	23.2031	1.27265	2.85013	0.00015	0.00331184	yes
606	MSTRG.11693	"NCU05151T0"	dim5_DD	dim5_LP	OK	9.8506	23.7211	1.26789	3.11534	5e-05	0.00128834	yes
2001	MSTRG.3721	"NCU05384T0"	dim5_DD	dim5_LP	OK	11.4126	27.2729	1.25685	2.91687	0.00015	0.00331184	yes
2106	MSTRG.4013	"NCU01812T0"	dim5_DD	dim5_LP	OK	4.53821	10.7924	1.24982	2.51891	0.00055	0.00950481	yes
1971	MSTRG.35	"NCU08057T0"	dim5_DD	dim5_LP	OK	29.5337	69.8045	1.24096	3.0197	5e-05	0.00128834	yes
2706	MSTRG.6222	"NCU16699T0"	dim5_DD	dim5_LP	OK	5.31736	12.5501	1.23892	2.46555	0.00075	0.0121238	yes
3996	MSTRG.9243	"NCU01088T0"	dim5_DD	dim5_LP	OK	10.8371	25.5076	1.23495	2.91056	5e-05	0.00128834	yes
4191	MSTRG.9571	"NCU16998T0"	dim5_DD	dim5_LP	OK	23.2184	54.0429	1.21884	2.99897	5e-05	0.00128834	yes
666	MSTRG.11793	"NCU05070T0"	dim5_DD	dim5_LP	OK	10.8744	25.0191	1.20209	2.67997	0.0002	0.00420033	yes
4041	MSTRG.9270	"NCU01108T0"	dim5_DD	dim5_LP	OK	20.0941	46.2269	1.20196	2.84409	0.0001	0.00234369	yes
1641	MSTRG.2644	"NCU00605T0"	dim5_DD	dim5_LP	OK	4.14056	9.48699	1.19612	2.51108	0.00085	0.013367	yes
2886	MSTRG.6537	"NCU04851T0"	dim5_DD	dim5_LP	OK	6.71676	15.1889	1.17718	2.90433	0.0001	0.00234369	yes
1911	MSTRG.3428	"MSTRG.3428.3"	dim5_DD	dim5_LP	OK	4.19337	9.41088	1.16622	2.50607	0.00045	0.00807047	yes
1161	MSTRG.13016	"NCU08167T0"	dim5_DD	dim5_LP	OK	100.761	225.844	1.16439	2.66223	0.0001	0.00234369	yes
2421	MSTRG.5488	"NCU00097T0"	dim5_DD	dim5_LP	OK	10.0659	22.5272	1.16219	2.78724	0.00025	0.00504322	yes
2301	MSTRG.501	"NCU02043T0"	dim5_DD	dim5_LP	OK	10.3801	23.1777	1.15891	2.70848	0.0001	0.00234369	yes
3936	MSTRG.905	"NCU02540T0"	dim5_DD	dim5_LP	OK	19.3286	42.8462	1.14843	2.44741	0.001	0.0151522	yes
4146	MSTRG.9401	"NCU01219T0"	dim5_DD	dim5_LP	OK	169.274	374.916	1.14721	2.50988	0.0005	0.00879069	yes
3906	MSTRG.8876	"NCU03639T1"	dim5_DD	dim5_LP	OK	24.0185	52.9238	1.13977	2.72444	0.00025	0.00504322	yes
1581	MSTRG.2399	"NCU10894T0"	dim5_DD	dim5_LP	OK	56.916	125.229	1.13766	2.6117	0.00035	0.00660875	yes
1851	MSTRG.3261	"NCU08606T1"	dim5_DD	dim5_LP	OK	5.12626	11.2462	1.13346	2.69471	0.00015	0.00331184	yes
4161	MSTRG.9521	"NCU01312T0"	dim5_DD	dim5_LP	OK	12.9193	28.3264	1.13262	2.65293	0.0006	0.0101835	yes
1071	MSTRG.12799	"NCU02282T0"	dim5_DD	dim5_LP	OK	12.6918	27.7473	1.12845	2.85512	5e-05	0.00128834	yes
1386	MSTRG.1604	"NCU03213T0"	dim5_DD	dim5_LP	OK	27.6597	60.423	1.12731	2.72273	0.0001	0.00234369	yes
1806	MSTRG.3177	"NCU02765T0"	dim5_DD	dim5_LP	OK	253.55	553.54	1.12642	2.82386	0.0001	0.00234369	yes
3396	MSTRG.7564	"NCU04343T0"	dim5_DD	dim5_LP	OK	211.76	458.622	1.11488	2.42579	0.0007	0.0115127	yes
3891	MSTRG.8786	"NCU04560T0"	dim5_DD	dim5_LP	OK	4.32286	9.32678	1.10939	2.31456	0.00085	0.013367	yes
2061	MSTRG.387	"NCU02094T1"	dim5_DD	dim5_LP	OK	17.5306	37.8191	1.10924	2.84732	5e-05	0.00128834	yes
1326	MSTRG.1460	"NCU03112T0"	dim5_DD	dim5_LP	OK	94.8521	202.809	1.09637	2.82915	5e-05	0.00128834	yes
3861	MSTRG.8774	"NCU11040T0"	dim5_DD	dim5_LP	OK	43.9153	93.8063	1.09496	2.83687	5e-05	0.00128834	yes
3096	MSTRG.681	"NCU01922T0"	dim5_DD	dim5_LP	OK	15.5782	33.1017	1.08738	2.41721	0.00085	0.013367	yes
126	MSTRG.10355	"NCU09844T0"	dim5_DD	dim5_LP	OK	5.94315	12.5843	1.08232	2.5283	0.0005	0.00879069	yes
3036	MSTRG.670	"NCU01924T1"	dim5_DD	dim5_LP	OK	40.9691	86.6942	1.0814	2.78777	0.0001	0.00234369	yes
231	MSTRG.10624	"NCU07061T0"	dim5_DD	dim5_LP	OK	40.0658	84.6125	1.0785	2.4391	0.0007	0.0115127	yes
3006	MSTRG.6687	"NCU07971T0"	dim5_DD	dim5_LP	OK	7.24598	15.2595	1.07446	2.70045	0.0003	0.00584877	yes
2361	MSTRG.52	"NCU08070T0"	dim5_DD	dim5_LP	OK	26.6996	55.9324	1.06687	2.6876	0.00025	0.00504322	yes
2766	MSTRG.6319	"NCU08537T0"	dim5_DD	dim5_LP	OK	19.0602	39.7235	1.05943	2.72721	5e-05	0.00128834	yes
1056	MSTRG.12770	"NCU02307T0"	dim5_DD	dim5_LP	OK	49.1997	102.224	1.05501	2.71853	0.0002	0.00420033	yes
396	MSTRG.11162	"NCU05491T0"	dim5_DD	dim5_LP	OK	26.1521	54.0853	1.04831	2.70645	5e-05	0.00128834	yes
2571	MSTRG.579	"NCU01989T0"	dim5_DD	dim5_LP	OK	20.7778	42.8623	1.04467	2.48746	0.0004	0.007345	yes
2946	MSTRG.6611	"NCU04921T0"	dim5_DD	dim5_LP	OK	24.1624	49.6096	1.03785	2.61106	0.00055	0.00950481	yes
36	MSTRG.10239	"NCU04295T0"	dim5_DD	dim5_LP	OK	12.6591	25.8637	1.03076	2.59725	0.00025	0.00504322	yes
1986	MSTRG.3639	"NCU03363T0"	dim5_DD	dim5_LP	OK	10.4674	21.2767	1.02337	2.61228	0.0002	0.00420033	yes
1521	MSTRG.2210	"MSTRG.2210.1"	dim5_DD	dim5_LP	OK	74.6136	150.549	1.01273	2.58337	0.00025	0.00504322	yes
1236	MSTRG.13187	"MSTRG.13187.1"	dim5_DD	dim5_LP	OK	9.8901	19.9217	1.01028	2.57764	0.0003	0.00584877	yes
3801	MSTRG.8629	"NCU04656T0"	dim5_DD	dim5_LP	OK	101.037	201.754	0.997716	2.48451	0.0008	0.012757	yes
3546	MSTRG.7994	"NCU07024T0"	dim5_DD	dim5_LP	OK	101.421	201.758	0.992273	2.47796	0.00075	0.0121238	yes
3291	MSTRG.7295	"NCU06307T0"	dim5_DD	dim5_LP	OK	30.9189	61.1259	0.983296	2.52974	0.0004	0.007345	yes
771	MSTRG.11989	"NCU09992T0"	dim5_DD	dim5_LP	OK	61.0399	120.186	0.977444	2.53785	0.0005	0.00879069	yes
4296	MSTRG.9738	"NCU11337T0"	dim5_DD	dim5_LP	OK	152.437	298.247	0.968294	2.40129	0.0008	0.012757	yes
1761	MSTRG.3112	"NCU02809T0"	dim5_DD	dim5_LP	OK	34.907	68.1391	0.964965	2.51518	0.00035	0.00660875	yes
2271	MSTRG.4922	"NCU05735T0"	dim5_DD	dim5_LP	OK	12.7508	24.8746	0.964085	2.3711	0.00075	0.0121238	yes
276	MSTRG.10842	"NCU04805T0"	dim5_DD	dim5_LP	OK	58.7935	114.614	0.963056	2.3979	0.0005	0.00879069	yes
2586	MSTRG.5822	"NCU00326T1"	dim5_DD	dim5_LP	OK	41.9506	81.5519	0.959029	2.51279	0.00035	0.00660875	yes
2931	MSTRG.6606	"NCU04914T0"	dim5_DD	dim5_LP	OK	28.8439	56.0323	0.957993	2.4229	0.00075	0.0121238	yes
1836	MSTRG.3251	"NCU08600T0"	dim5_DD	dim5_LP	OK	7.16789	13.8713	0.952484	2.38983	0.00085	0.013367	yes
3591	MSTRG.8121	"NCU05306T0"	dim5_DD	dim5_LP	OK	15.6623	30.2239	0.948396	2.31605	0.0009	0.0139539	yes
2526	MSTRG.5699	"NCU00242T0"	dim5_DD	dim5_LP	OK	22.735	43.812	0.946414	2.44315	0.00055	0.00950481	yes
2496	MSTRG.5666	"NCU00227T0"	dim5_DD	dim5_LP	OK	19.5305	37.3405	0.935011	2.31962	0.001	0.0151522	yes
2166	MSTRG.4362	"NCU01510T0"	dim5_DD	dim5_LP	OK	27.4661	52.0942	0.923468	2.38887	0.001	0.0151522	yes
3696	MSTRG.8418	"NCU07778T0"	dim5_DD	dim5_LP	OK	17.8861	33.919	0.923253	2.41748	0.0008	0.012757	yes
2616	MSTRG.5919	"NCU00401T1"	dim5_DD	dim5_LP	OK	29.4388	55.7488	0.921224	2.38413	0.0012	0.0174659	yes
1011	MSTRG.12669	"NCU02378T0"	dim5_DD	dim5_LP	OK	21.779	41.162	0.918373	2.36963	0.00085	0.013367	yes
531	MSTRG.1147	"NCU02712T0"	dim5_DD	dim5_LP	OK	48.7138	91.9198	0.916046	2.3887	0.00085	0.013367	yes
2451	MSTRG.5545	"NCU00135T1"	dim5_DD	dim5_LP	OK	46.5734	87.3279	0.906936	2.35336	0.0008	0.012757	yes
3786	MSTRG.8609	"NCU04669T0"	dim5_DD	dim5_LP	OK	45.1278	84.1097	0.898255	2.31055	0.0009	0.0139539	yes
2961	MSTRG.6626	"NCU04931T0"	dim5_DD	dim5_LP	OK	312.257	166.469	-0.907483	-2.28172	0.0009	0.0139539	yes
2031	MSTRG.3842	"NCU06836T0"	dim5_DD	dim5_LP	OK	66.9997	35.161	-0.930178	-2.4298	0.00095	0.0145566	yes
2181	MSTRG.4398	"NCU01487T0"	dim5_DD	dim5_LP	OK	182.19	95.2784	-0.935224	-2.35598	0.0007	0.0115127	yes
816	MSTRG.12040	"NCU09048T0"	dim5_DD	dim5_LP	OK	23.2504	11.9584	-0.959236	-2.4518	0.0004	0.007345	yes
756	MSTRG.11981	"NCU09458T0"	dim5_DD	dim5_LP	OK	26.3732	13.4172	-0.974986	-2.4274	0.0009	0.0139539	yes
2406	MSTRG.5381	"NCU00026T0"	dim5_DD	dim5_LP	OK	26.4206	13.1515	-1.00644	-2.48164	0.0004	0.007345	yes
3081	MSTRG.6786	"NCU07894T0"	dim5_DD	dim5_LP	OK	185.433	91.866	-1.01329	-2.4769	0.00055	0.00950481	yes
1401	MSTRG.1655	"NCU03253T0"	dim5_DD	dim5_LP	OK	117.638	57.8284	-1.02451	-2.63621	5e-05	0.00128834	yes
2151	MSTRG.435	"NCU02096T0"	dim5_DD	dim5_LP	OK	18.8689	9.23656	-1.03058	-2.3879	0.0009	0.0139539	yes
3576	MSTRG.8117	"NCU05311T0"	dim5_DD	dim5_LP	OK	50.2067	24.5326	-1.03318	-2.57123	0.00025	0.00504322	yes
3216	MSTRG.7146	"NCU08288T0"	dim5_DD	dim5_LP	OK	37.8867	18.4651	-1.03689	-2.59354	0.0003	0.00584877	yes
2346	MSTRG.5077	"NCU06428T0"	dim5_DD	dim5_LP	OK	7.96585	3.87803	-1.0385	-2.33741	0.00095	0.0145566	yes
4206	MSTRG.9617	"NCU01391T0"	dim5_DD	dim5_LP	OK	203.877	97.9372	-1.05777	-2.54169	0.0006	0.0101835	yes
1731	MSTRG.2892	"NCU02977T0"	dim5_DD	dim5_LP	OK	88.6139	42.4486	-1.06181	-2.77414	0.00015	0.00331184	yes
2241	MSTRG.4807	"NCU09171T0"	dim5_DD	dim5_LP	OK	16.3179	7.69667	-1.08415	-2.4635	0.0006	0.0101835	yes
1926	MSTRG.3446	"NCU03509T0"	dim5_DD	dim5_LP	OK	42.966	20.2135	-1.08788	-2.75151	5e-05	0.00128834	yes
906	MSTRG.12224	"NCU08397T0"	dim5_DD	dim5_LP	OK	171.222	79.5501	-1.10594	-2.66871	0.00025	0.00504322	yes
3846	MSTRG.8768	"NCU04570T0"	dim5_DD	dim5_LP	OK	15.6275	7.18376	-1.12128	-2.691	0.0001	0.00234369	yes
786	MSTRG.12000	"NCU09020T0"	dim5_DD	dim5_LP	OK	51.4341	23.6263	-1.12233	-2.9069	5e-05	0.00128834	yes
3231	MSTRG.7220	"NCU06366T0"	dim5_DD	dim5_LP	OK	76.7155	34.7541	-1.14233	-2.97	5e-05	0.00128834	yes
3276	MSTRG.7269	"NCU06327T0"	dim5_DD	dim5_LP	OK	28.3545	12.4481	-1.18766	-2.93792	5e-05	0.00128834	yes
3711	MSTRG.8479	"NCU07736T0"	dim5_DD	dim5_LP	OK	30.0658	13.0994	-1.19863	-2.9682	0.0001	0.00234369	yes
3321	MSTRG.7400	"NCU04472T1"	dim5_DD	dim5_LP	OK	82.8227	35.2366	-1.23295	-3.06616	5e-05	0.00128834	yes
1611	MSTRG.2485	"NCU00721T0"	dim5_DD	dim5_LP	OK	31.1664	13.2115	-1.23819	-2.84823	5e-05	0.00128834	yes
1941	MSTRG.3467	"NCU03497T0"	dim5_DD	dim5_LP	OK	53.9866	22.516	-1.26165	-3.13244	5e-05	0.00128834	yes
3606	MSTRG.8125	"NCU05303T0"	dim5_DD	dim5_LP	OK	209.335	87.1579	-1.26411	-3.23178	5e-05	0.00128834	yes
3621	MSTRG.8276	"NCU05189T0"	dim5_DD	dim5_LP	OK	11.9813	4.98117	-1.26623	-2.53702	0.0004	0.007345	yes
1146	MSTRG.12992	"NCU08155T0"	dim5_DD	dim5_LP	OK	277.209	115.192	-1.26693	-3.05643	0.0001	0.00234369	yes
66	MSTRG.10292	"NCU08927T0"	dim5_DD	dim5_LP	OK	64.0521	26.24	-1.28748	-3.26464	5e-05	0.00128834	yes
381	MSTRG.11147	"NCU05501T0"	dim5_DD	dim5_LP	OK	18.351	7.50439	-1.29005	-2.76453	0.00015	0.00331184	yes
1566	MSTRG.2362	"NCU00821T0"	dim5_DD	dim5_LP	OK	25.5057	10.2962	-1.3087	-3.08006	5e-05	0.00128834	yes
2646	MSTRG.6078	"NCU08986T1"	dim5_DD	dim5_LP	OK	45.6404	17.6406	-1.37141	-3.24583	0.0001	0.00234369	yes
1956	MSTRG.3478	"NCU03488T0"	dim5_DD	dim5_LP	OK	83.3924	31.6727	-1.39667	-3.59597	5e-05	0.00128834	yes
2391	MSTRG.5310	"NCU06255T0"	dim5_DD	dim5_LP	OK	23.0744	8.68048	-1.41045	-2.8411	0.00025	0.00504322	yes
3771	MSTRG.8554	"MSTRG.8554.1"	dim5_DD	dim5_LP	OK	14.9746	5.63262	-1.41064	-2.80061	0.0001	0.00234369	yes
2661	MSTRG.6110	"NCU09010T0"	dim5_DD	dim5_LP	OK	156.817	58.2497	-1.42875	-3.53028	5e-05	0.00128834	yes
591	MSTRG.11624	"NCU05948T1"	dim5_DD	dim5_LP	OK	21.9875	7.19013	-1.61259	-3.55008	5e-05	0.00128834	yes
3441	MSTRG.7772	"NCU07334T0"	dim5_DD	dim5_LP	OK	31.4313	10.1751	-1.62716	-3.98187	5e-05	0.00128834	yes
171	MSTRG.10526	"NCU17055T0"	dim5_DD	dim5_LP	OK	29.0285	9.15079	-1.6655	-3.44043	5e-05	0.00128834	yes
3756	MSTRG.8548	"NCU09698T0"	dim5_DD	dim5_LP	OK	11.509	3.58935	-1.68096	-3.35747	5e-05	0.00128834	yes
351	MSTRG.11041	"NCU05577T0"	dim5_DD	dim5_LP	OK	30.4	8.97324	-1.76037	-3.26328	5e-05	0.00128834	yes
2991	MSTRG.6662	"NCU04963T0"	dim5_DD	dim5_LP	OK	15.8588	4.4315	-1.83942	-3.93725	5e-05	0.00128834	yes
2226	MSTRG.4777	"NCU09497T0"	dim5_DD	dim5_LP	OK	13.8997	3.29049	-2.07868	-4.02542	5e-05	0.00128834	yes
306	MSTRG.10919	"NCU09782T0"	dim5_DD	dim5_LP	OK	10.5034	2.39115	-2.13508	-3.93158	5e-05	0.00128834	yes
801	MSTRG.12037	"MSTRG.12037.1"	dim5_DD	dim5_LP	OK	11.5298	2.47512	-2.21979	-3.26849	0.00015	0.00331184	yes
3261	MSTRG.7249	"NCU06341T1"	dim5_DD	dim5_LP	OK	35.6154	7.63264	-2.22225	-5.27398	5e-05	0.00128834	yes
